# Supplementary material for: The Mechanism Action of German Chamomile (Matricaria recutita L.) in the Treatment of Eczema: Based on Dose–Effect Weight Coefficient Network Pharmacology
Source: Front Pharmacol. 2021 Sep 30;12:706836. doi: 10.3389/fphar.2021.706836 (PMC8515037; doi:10.3389/fphar.2021.706836)
Supplement: Supplementary file 1 [file DataSheet4.xlsx]

## Sheet: trans-β-Ocimene
SwissTargetPrediction
Target	Common name	Uniprot ID	ChEMBL ID	Target Class	Probability*	Known actives (3D/2D)
Peroxisome proliferator-activated receptor alpha	PPARA	Q07869	CHEMBL239	Nuclear receptor	0.0339707	1 / 0
Cannabinoid receptor 2	CNR2	P34972	CHEMBL253	Family A G protein-coupled receptor	0.0339707	1 / 0
Monoamine oxidase B	MAOB	P27338	CHEMBL2039	Oxidoreductase	0	1 / 0
Acetylcholinesterase	ACHE	P22303	CHEMBL220	Hydrolase	0	4 / 0
C-X-C chemokine receptor type 3	CXCR3	P49682	CHEMBL4441	Family A G protein-coupled receptor	0	1 / 0
Serotonin 2a (5-HT2a) receptor	HTR2A	P28223	CHEMBL224	Family A G protein-coupled receptor	0	1 / 0
Testis-specific androgen-binding protein	SHBG	P04278	CHEMBL3305	Secreted protein	0	1 / 0
		γ-Elemene

## Sheet: γ-Elemene
SwissTargetPrediction
Target	Common name	Uniprot ID	ChEMBL ID	Target Class	Probability*	Known actives (3D/2D)
Peroxisome proliferator-activated receptor alpha	PPARA	Q07869	CHEMBL239	Nuclear receptor	0.052424	1 / 3
Cannabinoid receptor 2	CNR2	P34972	CHEMBL253	Family A G protein-coupled receptor	0.052424	1 / 1
C-X-C chemokine receptor type 3	CXCR3	P49682	CHEMBL4441	Family A G protein-coupled receptor	0.0428942	1 / 0
LXR-alpha	NR1H3	Q13133	CHEMBL2808	Nuclear receptor	0.0428942	0 / 10
Serotonin 2a (5-HT2a) receptor	HTR2A	P28223	CHEMBL224	Family A G protein-coupled receptor	0	1 / 0
Monoamine oxidase B	MAOB	P27338	CHEMBL2039	Oxidoreductase	0	1 / 0
UDP-glucuronosyltransferase 2B7	UGT2B7	P16662	CHEMBL4370	Enzyme	0	0 / 4
Monoglyceride lipase	MGLL	Q99685	CHEMBL4191	Enzyme	0	2 / 0
Cytochrome P450 19A1	CYP19A1	P11511	CHEMBL1978	Cytochrome P450	0	0 / 89
Nuclear receptor subfamily 1 group I member 3 (by homology)	NR1I3	Q14994	CHEMBL5503	Nuclear receptor	0	0 / 2
Cytochrome P450 1A2	CYP1A2	P05177	CHEMBL3356	Cytochrome P450	0	2 / 0
Anandamide amidohydrolase	FAAH	O00519	CHEMBL2243	Enzyme	0	0 / 3
Vanilloid receptor	TRPV1	Q8NER1	CHEMBL4794	Voltage-gated ion channel	0	0 / 2
Androgen Receptor (by homology)	AR	P10275	CHEMBL1871	Nuclear receptor	0	0 / 28
Estrogen receptor alpha	ESR1	P03372	CHEMBL206	Nuclear receptor	0	0 / 20
Muscarinic acetylcholine receptor M2	CHRM2	P08172	CHEMBL211	Family A G protein-coupled receptor	0	0 / 1
Serotonin transporter	SLC6A4	P31645	CHEMBL228	Electrochemical transporter	0	0 / 1
Cytochrome P450 2C19	CYP2C19	P33261	CHEMBL3622	Cytochrome P450	0	0 / 1
Estrogen receptor beta	ESR2	Q92731	CHEMBL242	Nuclear receptor	0	0 / 22
Squalene monooxygenase	SQLE	Q14534	CHEMBL3592	Enzyme	0	0 / 4
Protein-tyrosine phosphatase 1B	PTPN1	P18031	CHEMBL335	Phosphatase	0	0 / 8
Monoamine oxidase A	MAOA	P21397	CHEMBL1951	Oxidoreductase	0	1 / 0
Serotonin 2c (5-HT2c) receptor	HTR2C	P28335	CHEMBL225	Family A G protein-coupled receptor	0	1 / 0
Peptidyl-prolyl cis-trans isomerase NIMA-interacting 1	PIN1	Q13526	CHEMBL2288	Enzyme	0	1 / 0
T-cell protein-tyrosine phosphatase	PTPN2	P17706	CHEMBL3807	Phosphatase	0	0 / 7
Transient receptor potential cation channel subfamily A member 1	TRPA1	O75762	CHEMBL6007	Voltage-gated ion channel	0	0 / 1
DNA topoisomerase I	TOP1	P11387	CHEMBL1781	Isomerase	0	0 / 2
Adenosine A1 receptor	ADORA1	P30542	CHEMBL226	Family A G protein-coupled receptor	0	0 / 1
Adenosine A2a receptor	ADORA2A	P29274	CHEMBL251	Family A G protein-coupled receptor	0	0 / 1
Adenosine A3 receptor	ADORA3	P0DMS8	CHEMBL256	Family A G protein-coupled receptor	0	0 / 1
Nuclear receptor ROR-gamma	RORC	P51449	CHEMBL1741186	Nuclear receptor	0	0 / 6
Sterol regulatory element-binding protein 2	SREBF2	Q12772	CHEMBL1795166	Unclassified protein	0	0 / 1
Niemann-Pick C1-like protein 1	NPC1L1	Q9UHC9	CHEMBL2027	Other membrane protein	0	0 / 2
Cathepsin D	CTSD	P07339	CHEMBL2581	Protease	0	0 / 1
Cytochrome P450 17A1	CYP17A1	P05093	CHEMBL3522	Cytochrome P450	0	0 / 5
Dual specificity phosphatase Cdc25A	CDC25A	P30304	CHEMBL3775	Phosphatase	0	0 / 2
HMG-CoA reductase	HMGCR	P04035	CHEMBL402	Oxidoreductase	0	0 / 2
Dual specificity phosphatase Cdc25B	CDC25B	P30305	CHEMBL4804	Phosphatase	0	0 / 1
Cytochrome P450 51 (by homology)	CYP51A1	Q16850	CHEMBL3849	Cytochrome P450	0	0 / 1
Testis-specific androgen-binding protein	SHBG	P04278	CHEMBL3305	Secreted protein	0	1 / 8
Steroid 5-alpha-reductase 1	SRD5A1	P18405	CHEMBL1787	Oxidoreductase	0	0 / 1
Steroid 5-alpha-reductase 2	SRD5A2	P31213	CHEMBL1856	Oxidoreductase	0	0 / 1
Mineralocorticoid receptor	NR3C2	P08235	CHEMBL1994	Nuclear receptor	0	0 / 3
Glucocorticoid receptor	NR3C1	P04150	CHEMBL2034	Nuclear receptor	0	0 / 3
Progesterone receptor	PGR	P06401	CHEMBL208	Nuclear receptor	0	0 / 5
Corticosteroid binding globulin	SERPINA6	P08185	CHEMBL2421	Secreted protein	0	0 / 4
Sigma opioid receptor	SIGMAR1	Q99720	CHEMBL287	Membrane receptor	0	0 / 1
Pregnane X receptor	NR1I2	O75469	CHEMBL3401	Nuclear receptor	0	0 / 2
Estradiol 17-beta-dehydrogenase 3	HSD17B3	P37058	CHEMBL4234	Enzyme	0	0 / 1
Fatty acid-binding protein, liver (by homology)	FABP1	P07148	CHEMBL5421	Fatty acid binding protein family	0	0 / 2
Vitamin D receptor	VDR	P11473	CHEMBL1977	Nuclear receptor	0	0 / 14
Arachidonate 5-lipoxygenase	ALOX5	P09917	CHEMBL215	Oxidoreductase	0	0 / 3
Potassium-transporting ATPase alpha chain 2	ATP12A	P54707	CHEMBL2933	Primary active transporter	0	0 / 1
Protein-tyrosine phosphatase 1C	PTPN6	P29350	CHEMBL3166	Phosphatase	0	0 / 1
11-beta-hydroxysteroid dehydrogenase 1	HSD11B1	P28845	CHEMBL4235	Enzyme	0	0 / 1
Acetylcholinesterase	ACHE	P22303	CHEMBL220	Hydrolase	0	1 / 1
Norepinephrine transporter	SLC6A2	P23975	CHEMBL222	Electrochemical transporter	0	1 / 1
C-C chemokine receptor type 5	CCR5	P51681	CHEMBL274	Family A G protein-coupled receptor	0	0 / 1
Fatty acid binding protein adipocyte	FABP4	P15090	CHEMBL2083	Fatty acid binding protein family	0	0 / 1
Peroxisome proliferator-activated receptor gamma	PPARG	P37231	CHEMBL235	Nuclear receptor	0	0 / 2
Telomerase reverse transcriptase	TERT	O14746	CHEMBL2916	Enzyme	0	0 / 1
Fatty acid binding protein muscle	FABP3	P05413	CHEMBL3344	Fatty acid binding protein family	0	0 / 1
Fatty acid binding protein epidermal	FABP5	Q01469	CHEMBL3674	Fatty acid binding protein family	0	0 / 1
Peroxisome proliferator-activated receptor delta	PPARD	Q03181	CHEMBL3979	Nuclear receptor	0	0 / 2
Cannabinoid receptor 1 (by homology)	CNR1	P21554	CHEMBL218	Family A G protein-coupled receptor	0	0 / 1
Zinc finger protein GLI2	GLI2	P10070	CHEMBL5119	Transcription factor	0	0 / 1
Zinc finger protein GLI1	GLI1	P08151	CHEMBL5461	Transcription factor	0	0 / 1
Butyrylcholinesterase	BCHE	P06276	CHEMBL1914	Hydrolase	0	1 / 1
Cyclooxygenase-1	PTGS1	P23219	CHEMBL221	Oxidoreductase	0	1 / 1
Cyclooxygenase-2	PTGS2	P35354	CHEMBL230	Oxidoreductase	0	1 / 1

## Sheet: α-Copaene
SwissTargetPrediction
Target	Common name	Uniprot ID	ChEMBL ID	Target Class	Probability*	Known actives (3D/2D)
Peroxisome proliferator-activated receptor alpha	PPARA	Q07869	CHEMBL239	Nuclear receptor	0.100058	1 / 6
Cannabinoid receptor 2	CNR2	P34972	CHEMBL253	Family A G protein-coupled receptor	0.100058	1 / 1
Androgen Receptor (by homology)	AR	P10275	CHEMBL1871	Nuclear receptor	0.0428942	0 / 58
Cytochrome P450 19A1	CYP19A1	P11511	CHEMBL1978	Cytochrome P450	0.0428942	0 / 175
Estrogen receptor alpha	ESR1	P03372	CHEMBL206	Nuclear receptor	0.0428942	0 / 34
Muscarinic acetylcholine receptor M2	CHRM2	P08172	CHEMBL211	Family A G protein-coupled receptor	0.0428942	0 / 1
Acetylcholinesterase	ACHE	P22303	CHEMBL220	Hydrolase	0.0428942	0 / 1
Norepinephrine transporter	SLC6A2	P23975	CHEMBL222	Electrochemical transporter	0.0428942	0 / 1
Serotonin transporter	SLC6A4	P31645	CHEMBL228	Electrochemical transporter	0.0428942	0 / 1
Cytochrome P450 2C19	CYP2C19	P33261	CHEMBL3622	Cytochrome P450	0.0428942	0 / 1
Butyrylcholinesterase	BCHE	P06276	CHEMBL1914	Hydrolase	0.0428942	0 / 2
Protein-tyrosine phosphatase 1B	PTPN1	P18031	CHEMBL335	Phosphatase	0.0428942	0 / 32
Nuclear receptor subfamily 1 group I member 3 (by homology)	NR1I3	Q14994	CHEMBL5503	Nuclear receptor	0.0428942	0 / 2
Anandamide amidohydrolase	FAAH	O00519	CHEMBL2243	Enzyme	0.0428942	0 / 10
Vanilloid receptor	TRPV1	Q8NER1	CHEMBL4794	Voltage-gated ion channel	0.0428942	0 / 2
Cyclooxygenase-1	PTGS1	P23219	CHEMBL221	Oxidoreductase	0	0 / 2
LXR-alpha	NR1H3	Q13133	CHEMBL2808	Nuclear receptor	0	0 / 16
Testis-specific androgen-binding protein	SHBG	P04278	CHEMBL3305	Secreted protein	0	1 / 30
Nuclear receptor ROR-gamma	RORC	P51449	CHEMBL1741186	Nuclear receptor	0	0 / 10
Sterol regulatory element-binding protein 2	SREBF2	Q12772	CHEMBL1795166	Unclassified protein	0	0 / 1
Niemann-Pick C1-like protein 1	NPC1L1	Q9UHC9	CHEMBL2027	Other membrane protein	0	0 / 7
Estrogen receptor beta	ESR2	Q92731	CHEMBL242	Nuclear receptor	0	0 / 42
Cathepsin D	CTSD	P07339	CHEMBL2581	Protease	0	0 / 1
Cytochrome P450 17A1	CYP17A1	P05093	CHEMBL3522	Cytochrome P450	0	0 / 29
HMG-CoA reductase	HMGCR	P04035	CHEMBL402	Oxidoreductase	0	0 / 3
Cytochrome P450 51 (by homology)	CYP51A1	Q16850	CHEMBL3849	Cytochrome P450	0	0 / 2
C-X-C chemokine receptor type 3	CXCR3	P49682	CHEMBL4441	Family A G protein-coupled receptor	0	1 / 0
T-cell protein-tyrosine phosphatase	PTPN2	P17706	CHEMBL3807	Phosphatase	0	0 / 14
Steroid 5-alpha-reductase 1	SRD5A1	P18405	CHEMBL1787	Oxidoreductase	0	0 / 2
Steroid 5-alpha-reductase 2	SRD5A2	P31213	CHEMBL1856	Oxidoreductase	0	0 / 3
Mineralocorticoid receptor	NR3C2	P08235	CHEMBL1994	Nuclear receptor	0	0 / 4
Glucocorticoid receptor	NR3C1	P04150	CHEMBL2034	Nuclear receptor	0	0 / 6
Progesterone receptor	PGR	P06401	CHEMBL208	Nuclear receptor	0	0 / 7
Corticosteroid binding globulin	SERPINA6	P08185	CHEMBL2421	Secreted protein	0	0 / 13
Sigma opioid receptor	SIGMAR1	Q99720	CHEMBL287	Membrane receptor	0	0 / 2
Pregnane X receptor	NR1I2	O75469	CHEMBL3401	Nuclear receptor	0	0 / 2
Estradiol 17-beta-dehydrogenase 3	HSD17B3	P37058	CHEMBL4234	Enzyme	0	0 / 1
Fatty acid-binding protein, liver (by homology)	FABP1	P07148	CHEMBL5421	Fatty acid binding protein family	0	0 / 2
Serotonin 2a (5-HT2a) receptor	HTR2A	P28223	CHEMBL224	Family A G protein-coupled receptor	0	1 / 0
Protein-tyrosine phosphatase 1C	PTPN6	P29350	CHEMBL3166	Phosphatase	0	0 / 1
UDP-glucuronosyltransferase 2B7	UGT2B7	P16662	CHEMBL4370	Enzyme	0	0 / 4
Monoamine oxidase B	MAOB	P27338	CHEMBL2039	Oxidoreductase	0	1 / 0
Monoglyceride lipase	MGLL	Q99685	CHEMBL4191	Enzyme	0	2 / 0
Carboxylesterase 2	CES2	O00748	CHEMBL3180	Enzyme	0	0 / 2
Prolyl endopeptidase	PREP	P48147	CHEMBL3202	Protease	0	0 / 1
Prostaglandin E synthase	PTGES	O14684	CHEMBL5658	Enzyme	0	0 / 7
Plasma retinol-binding protein	RBP4	P02753	CHEMBL3100	Secreted protein	0	0 / 1
Nuclear receptor ROR-alpha	RORA	P35398	CHEMBL5868	Nuclear receptor	0	0 / 4
Squalene monooxygenase	SQLE	Q14534	CHEMBL3592	Enzyme	0	0 / 4
Fatty acid binding protein adipocyte	FABP4	P15090	CHEMBL2083	Fatty acid binding protein family	0	0 / 2
Peroxisome proliferator-activated receptor gamma	PPARG	P37231	CHEMBL235	Nuclear receptor	0	0 / 5
Telomerase reverse transcriptase	TERT	O14746	CHEMBL2916	Enzyme	0	0 / 1
Fatty acid binding protein muscle	FABP3	P05413	CHEMBL3344	Fatty acid binding protein family	0	0 / 4
Fatty acid binding protein epidermal	FABP5	Q01469	CHEMBL3674	Fatty acid binding protein family	0	0 / 1
Peroxisome proliferator-activated receptor delta	PPARD	Q03181	CHEMBL3979	Nuclear receptor	0	0 / 3
Cannabinoid receptor 1 (by homology)	CNR1	P21554	CHEMBL218	Family A G protein-coupled receptor	0	0 / 4
C-C chemokine receptor type 5	CCR5	P51681	CHEMBL274	Family A G protein-coupled receptor	0	0 / 1
Lanosterol synthase	LSS	P48449	CHEMBL3593	Enzyme	0	0 / 1
DNA polymerase beta	POLB	P06746	CHEMBL2392	Enzyme	0	0 / 4
Phosphodiesterase 4D	PDE4D	Q08499	CHEMBL288	Phosphodiesterase	0	0 / 1
Receptor-type tyrosine-protein phosphatase F (LAR)	PTPRF	P10586	CHEMBL3521	Membrane receptor	0	0 / 1
11-beta-hydroxysteroid dehydrogenase 1	HSD11B1	P28845	CHEMBL4235	Enzyme	0	0 / 8
Phospholipase A2 group 1B	PLA2G1B	P04054	CHEMBL4426	Enzyme	0	0 / 1
Dual specificity phosphatase Cdc25B	CDC25B	P30305	CHEMBL4804	Phosphatase	0	0 / 2
Low molecular weight phosphotyrosine protein phosphatase	ACP1	P24666	CHEMBL4903	Phosphatase	0	0 / 1
Glucose-6-phosphate 1-dehydrogenase	G6PD	P11413	CHEMBL5347	Enzyme	0	0 / 2
Aldo-keto reductase family 1 member B10	AKR1B10	O60218	CHEMBL5983	Enzyme	0	0 / 5
Acyl coenzyme A:cholesterol acyltransferase	CES1	P23141	CHEMBL2265	Enzyme	0	0 / 2
Acyl-CoA desaturase	SCD	O00767	CHEMBL5555	Enzyme	0	0 / 1
Protein farnesyltransferase	FNTA FNTB	P49354 P49356	CHEMBL2094108	Enzyme	0	0 / 1
CD81 antigen	CD81	P60033	CHEMBL1075180	Surface antigen	0	0 / 1
DNA topoisomerase I	TOP1	P11387	CHEMBL1781	Isomerase	0	0 / 2
Dopamine transporter	SLC6A3	Q01959	CHEMBL238	Electrochemical transporter	0	0 / 1
Adenosine A3 receptor	ADORA3	P0DMS8	CHEMBL256	Family A G protein-coupled receptor	0	0 / 4
MAP kinase ERK1	MAPK3	P27361	CHEMBL3385	Kinase	0	0 / 1
Protein kinase C eta	PRKCH	P24723	CHEMBL3616	Kinase	0	0 / 1
11-beta-hydroxysteroid dehydrogenase 2	HSD11B2	P80365	CHEMBL3746	Enzyme	0	0 / 5
Dual specificity phosphatase Cdc25A	CDC25A	P30304	CHEMBL3775	Phosphatase	0	0 / 3
Protein-tyrosine phosphatase 2C	PTPN11	Q06124	CHEMBL3864	Phosphatase	0	0 / 1
Transient receptor potential cation channel subfamily A member 1	TRPA1	O75762	CHEMBL6007	Voltage-gated ion channel	0	0 / 1
Arachidonate 5-lipoxygenase	ALOX5	P09917	CHEMBL215	Oxidoreductase	0	0 / 3
LXR-beta	NR1H2	P55055	CHEMBL4093	Nuclear receptor	0	0 / 1
Nitric oxide synthase, inducible	NOS2	P35228	CHEMBL4481	Enzyme	0	0 / 5
Beta-secretase 1	BACE1	P56817	CHEMBL4822	Protease	0	0 / 1
Hypoxia-inducible factor 1 alpha	HIF1A	Q16665	CHEMBL4261	Transcription factor	0	0 / 2
Anti-estrogen binding site (AEBS) (by homology)	DHCR7	Q9UBM7	CHEMBL2169735	Enzyme	0	0 / 1
Prostanoid EP1 receptor (by homology)	PTGER1	P34995	CHEMBL1811	Family A G protein-coupled receptor	0	0 / 1
Prostanoid EP2 receptor (by homology)	PTGER2	P43116	CHEMBL1881	Family A G protein-coupled receptor	0	0 / 1
Free fatty acid receptor 1	FFAR1	O14842	CHEMBL4422	Family A G protein-coupled receptor	0	0 / 1
Adenosine A1 receptor	ADORA1	P30542	CHEMBL226	Family A G protein-coupled receptor	0	0 / 1
Adenosine A2a receptor	ADORA2A	P29274	CHEMBL251	Family A G protein-coupled receptor	0	0 / 1
Sphingosine kinase 2	SPHK2	Q9NRA0	CHEMBL3023	Enzyme	0	0 / 1
Cytosolic phospholipase A2	PLA2G4A	P47712	CHEMBL3816	Enzyme	0	0 / 1
Sphingosine kinase 1	SPHK1	Q9NYA1	CHEMBL4394	Enzyme	0	0 / 1
Potassium-transporting ATPase alpha chain 2	ATP12A	P54707	CHEMBL2933	Primary active transporter	0	0 / 1
DNA topoisomerase II alpha	TOP2A	P11388	CHEMBL1806	Isomerase	0	0 / 1
TNF-alpha	TNF	P01375	CHEMBL1825	Secreted protein	0	0 / 1
Thromboxane-A synthase	TBXAS1	P24557	CHEMBL1835	Cytochrome P450	0	0 / 1
Alpha-2a adrenergic receptor	ADRA2A	P08913	CHEMBL1867	Family A G protein-coupled receptor	0	0 / 1
Adrenergic receptor alpha-2	ADRA2C	P18825	CHEMBL1916	Family A G protein-coupled receptor	0	0 / 1

## Sheet: (-)-Isocomene
SwissTargetPrediction
Target	Common name	Uniprot ID	ChEMBL ID	Target Class	Probability*	Known actives (3D/2D)
Peroxisome proliferator-activated receptor alpha	PPARA	Q07869	CHEMBL239	Nuclear receptor	0.0714808	1 / 9
Cannabinoid receptor 2	CNR2	P34972	CHEMBL253	Family A G protein-coupled receptor	0.0714808	1 / 1
Nuclear receptor subfamily 1 group I member 3 (by homology)	NR1I3	Q14994	CHEMBL5503	Nuclear receptor	0.0428942	0 / 2
Anandamide amidohydrolase	FAAH	O00519	CHEMBL2243	Enzyme	0.0428942	0 / 10
Vanilloid receptor	TRPV1	Q8NER1	CHEMBL4794	Voltage-gated ion channel	0.0428942	0 / 2
Androgen Receptor (by homology)	AR	P10275	CHEMBL1871	Nuclear receptor	0.0428942	0 / 51
Cytochrome P450 19A1	CYP19A1	P11511	CHEMBL1978	Cytochrome P450	0.0428942	0 / 164
Estrogen receptor alpha	ESR1	P03372	CHEMBL206	Nuclear receptor	0.0428942	0 / 30
Muscarinic acetylcholine receptor M2	CHRM2	P08172	CHEMBL211	Family A G protein-coupled receptor	0.0428942	0 / 1
Norepinephrine transporter	SLC6A2	P23975	CHEMBL222	Electrochemical transporter	0.0428942	0 / 1
Serotonin transporter	SLC6A4	P31645	CHEMBL228	Electrochemical transporter	0.0428942	0 / 1
Cytochrome P450 2C19	CYP2C19	P33261	CHEMBL3622	Cytochrome P450	0.0428942	0 / 1
Acetylcholinesterase	ACHE	P22303	CHEMBL220	Hydrolase	0	4 / 1
UDP-glucuronosyltransferase 2B7	UGT2B7	P16662	CHEMBL4370	Enzyme	0	0 / 4
Butyrylcholinesterase	BCHE	P06276	CHEMBL1914	Hydrolase	0	0 / 1
Protein-tyrosine phosphatase 1B	PTPN1	P18031	CHEMBL335	Phosphatase	0	0 / 14
Nuclear receptor ROR-gamma	RORC	P51449	CHEMBL1741186	Nuclear receptor	0	0 / 9
Sterol regulatory element-binding protein 2	SREBF2	Q12772	CHEMBL1795166	Unclassified protein	0	0 / 1
Niemann-Pick C1-like protein 1	NPC1L1	Q9UHC9	CHEMBL2027	Other membrane protein	0	0 / 5
Estrogen receptor beta	ESR2	Q92731	CHEMBL242	Nuclear receptor	0	0 / 36
Cathepsin D	CTSD	P07339	CHEMBL2581	Protease	0	0 / 1
LXR-alpha	NR1H3	Q13133	CHEMBL2808	Nuclear receptor	0	0 / 15
Testis-specific androgen-binding protein	SHBG	P04278	CHEMBL3305	Secreted protein	0	0 / 26
Cytochrome P450 17A1	CYP17A1	P05093	CHEMBL3522	Cytochrome P450	0	0 / 14
HMG-CoA reductase	HMGCR	P04035	CHEMBL402	Oxidoreductase	0	0 / 3
Cytochrome P450 51 (by homology)	CYP51A1	Q16850	CHEMBL3849	Cytochrome P450	0	0 / 2
T-cell protein-tyrosine phosphatase	PTPN2	P17706	CHEMBL3807	Phosphatase	0	0 / 13
Steroid 5-alpha-reductase 1	SRD5A1	P18405	CHEMBL1787	Oxidoreductase	0	0 / 1
Steroid 5-alpha-reductase 2	SRD5A2	P31213	CHEMBL1856	Oxidoreductase	0	0 / 1
Mineralocorticoid receptor	NR3C2	P08235	CHEMBL1994	Nuclear receptor	0	0 / 4
Glucocorticoid receptor	NR3C1	P04150	CHEMBL2034	Nuclear receptor	0	0 / 6
Progesterone receptor	PGR	P06401	CHEMBL208	Nuclear receptor	0	0 / 6
Corticosteroid binding globulin	SERPINA6	P08185	CHEMBL2421	Secreted protein	0	0 / 11
Sigma opioid receptor	SIGMAR1	Q99720	CHEMBL287	Membrane receptor	0	0 / 2
Pregnane X receptor	NR1I2	O75469	CHEMBL3401	Nuclear receptor	0	0 / 2
Estradiol 17-beta-dehydrogenase 3	HSD17B3	P37058	CHEMBL4234	Enzyme	0	0 / 1
Fatty acid-binding protein, liver (by homology)	FABP1	P07148	CHEMBL5421	Fatty acid binding protein family	0	0 / 2
Cyclooxygenase-1	PTGS1	P23219	CHEMBL221	Oxidoreductase	0	0 / 2
Squalene monooxygenase	SQLE	Q14534	CHEMBL3592	Enzyme	0	0 / 4
Fatty acid binding protein adipocyte	FABP4	P15090	CHEMBL2083	Fatty acid binding protein family	0	0 / 3
Cannabinoid receptor 1 (by homology)	CNR1	P21554	CHEMBL218	Family A G protein-coupled receptor	0	0 / 5
Peroxisome proliferator-activated receptor gamma	PPARG	P37231	CHEMBL235	Nuclear receptor	0	0 / 8
Telomerase reverse transcriptase	TERT	O14746	CHEMBL2916	Enzyme	0	0 / 1
Fatty acid binding protein muscle	FABP3	P05413	CHEMBL3344	Fatty acid binding protein family	0	0 / 4
Fatty acid binding protein epidermal	FABP5	Q01469	CHEMBL3674	Fatty acid binding protein family	0	0 / 1
Peroxisome proliferator-activated receptor delta	PPARD	Q03181	CHEMBL3979	Nuclear receptor	0	0 / 6
C-C chemokine receptor type 5	CCR5	P51681	CHEMBL274	Family A G protein-coupled receptor	0	0 / 1
Lanosterol synthase	LSS	P48449	CHEMBL3593	Enzyme	0	0 / 2
Acyl coenzyme A:cholesterol acyltransferase	CES1	P23141	CHEMBL2265	Enzyme	0	0 / 2
Acyl-CoA desaturase	SCD	O00767	CHEMBL5555	Enzyme	0	0 / 1
Transient receptor potential cation channel subfamily A member 1	TRPA1	O75762	CHEMBL6007	Voltage-gated ion channel	0	0 / 1
DNA topoisomerase I	TOP1	P11387	CHEMBL1781	Isomerase	0	0 / 2
Plasma retinol-binding protein	RBP4	P02753	CHEMBL3100	Secreted protein	0	0 / 1
Protein-tyrosine phosphatase 1C	PTPN6	P29350	CHEMBL3166	Phosphatase	0	0 / 1
Prostaglandin E synthase	PTGES	O14684	CHEMBL5658	Enzyme	0	0 / 5
Nuclear receptor ROR-alpha	RORA	P35398	CHEMBL5868	Nuclear receptor	0	0 / 2
Carboxylesterase 2	CES2	O00748	CHEMBL3180	Enzyme	0	0 / 2
Dual specificity phosphatase Cdc25A	CDC25A	P30304	CHEMBL3775	Phosphatase	0	0 / 4
Dual specificity phosphatase Cdc25B	CDC25B	P30305	CHEMBL4804	Phosphatase	0	0 / 2
Glucose-6-phosphate 1-dehydrogenase	G6PD	P11413	CHEMBL5347	Enzyme	0	0 / 2
Prostanoid EP2 receptor (by homology)	PTGER2	P43116	CHEMBL1881	Family A G protein-coupled receptor	0	0 / 3
Protein farnesyltransferase	FNTA FNTB	P49354 P49356	CHEMBL2094108	Enzyme	0	0 / 1
Prostanoid EP1 receptor (by homology)	PTGER1	P34995	CHEMBL1811	Family A G protein-coupled receptor	0	0 / 1
Prolyl endopeptidase	PREP	P48147	CHEMBL3202	Protease	0	0 / 1
Free fatty acid receptor 1	FFAR1	O14842	CHEMBL4422	Family A G protein-coupled receptor	0	0 / 2
Dopamine transporter	SLC6A3	Q01959	CHEMBL238	Electrochemical transporter	0	0 / 1
Adenosine A3 receptor	ADORA3	P0DMS8	CHEMBL256	Family A G protein-coupled receptor	0	0 / 2
MAP kinase ERK1	MAPK3	P27361	CHEMBL3385	Kinase	0	0 / 1
Adenosine A1 receptor	ADORA1	P30542	CHEMBL226	Family A G protein-coupled receptor	0	0 / 1
Adenosine A2a receptor	ADORA2A	P29274	CHEMBL251	Family A G protein-coupled receptor	0	0 / 1
Sphingosine kinase 2	SPHK2	Q9NRA0	CHEMBL3023	Enzyme	0	0 / 1
Cytosolic phospholipase A2	PLA2G4A	P47712	CHEMBL3816	Enzyme	0	0 / 1
Sphingosine kinase 1	SPHK1	Q9NYA1	CHEMBL4394	Enzyme	0	0 / 1
Potassium-transporting ATPase alpha chain 2	ATP12A	P54707	CHEMBL2933	Primary active transporter	0	0 / 1
11-beta-hydroxysteroid dehydrogenase 1	HSD11B1	P28845	CHEMBL4235	Enzyme	0	0 / 4
DNA polymerase beta (by homology)	POLB	P06746	CHEMBL2392	Enzyme	0	0 / 3
LXR-beta	NR1H2	P55055	CHEMBL4093	Nuclear receptor	0	0 / 1
Phosphodiesterase 4D	PDE4D	Q08499	CHEMBL288	Phosphodiesterase	0	0 / 1
Receptor-type tyrosine-protein phosphatase F (LAR)	PTPRF	P10586	CHEMBL3521	Membrane receptor	0	0 / 1
Phospholipase A2 group 1B	PLA2G1B	P04054	CHEMBL4426	Enzyme	0	0 / 1
Low molecular weight phosphotyrosine protein phosphatase	ACP1	P24666	CHEMBL4903	Phosphatase	0	0 / 1
Aldo-keto reductase family 1 member B10	AKR1B10	O60218	CHEMBL5983	Enzyme	0	0 / 2
Cyclooxygenase-2	PTGS2	P35354	CHEMBL230	Oxidoreductase	0	0 / 1
Zinc finger protein GLI2	GLI2	P10070	CHEMBL5119	Transcription factor	0	0 / 1
Zinc finger protein GLI1	GLI1	P08151	CHEMBL5461	Transcription factor	0	0 / 1
Prostanoid IP receptor	PTGIR	P43119	CHEMBL1995	Family A G protein-coupled receptor	0	0 / 2
11-beta-hydroxysteroid dehydrogenase 2	HSD11B2	P80365	CHEMBL3746	Enzyme	0	0 / 3
Nitric oxide synthase, inducible (by homology)	NOS2	P35228	CHEMBL4481	Enzyme	0	0 / 1
Squalene synthetase (by homology)	FDFT1	P37268	CHEMBL3338	Enzyme	0	0 / 1
Anti-estrogen binding site (AEBS) (by homology)	DHCR7	Q9UBM7	CHEMBL2169735	Enzyme	0	0 / 1

## Sheet: β-Copaene
SwissTargetPrediction
Target	Common name	Uniprot ID	ChEMBL ID	Target Class	Probability*	Known actives (3D/2D)
Peroxisome proliferator-activated receptor alpha	PPARA	Q07869	CHEMBL239	Nuclear receptor	0.0428942	1 / 1
Cannabinoid receptor 2	CNR2	P34972	CHEMBL253	Family A G protein-coupled receptor	0.0428942	1 / 1
C-X-C chemokine receptor type 3	CXCR3	P49682	CHEMBL4441	Family A G protein-coupled receptor	0	1 / 0
Serotonin 2a (5-HT2a) receptor	HTR2A	P28223	CHEMBL224	Family A G protein-coupled receptor	0	1 / 0
Monoamine oxidase B	MAOB	P27338	CHEMBL2039	Oxidoreductase	0	1 / 0
11-beta-hydroxysteroid dehydrogenase 1	HSD11B1	P28845	CHEMBL4235	Enzyme	0	0 / 1
UDP-glucuronosyltransferase 2B7	UGT2B7	P16662	CHEMBL4370	Enzyme	0	0 / 6
Monoglyceride lipase	MGLL	Q99685	CHEMBL4191	Enzyme	0	2 / 0
Cyclooxygenase-1	PTGS1	P23219	CHEMBL221	Oxidoreductase	0	0 / 1
LXR-alpha	NR1H3	Q13133	CHEMBL2808	Nuclear receptor	0	0 / 1
Testis-specific androgen-binding protein	SHBG	P04278	CHEMBL3305	Secreted protein	0	1 / 1
Protein-tyrosine phosphatase 1B	PTPN1	P18031	CHEMBL335	Phosphatase	0	0 / 1
Nuclear receptor subfamily 1 group I member 3 (by homology)	NR1I3	Q14994	CHEMBL5503	Nuclear receptor	0	0 / 1
Cytochrome P450 19A1	CYP19A1	P11511	CHEMBL1978	Cytochrome P450	0	0 / 34
Estrogen receptor alpha	ESR1	P03372	CHEMBL206	Nuclear receptor	0	0 / 1
Muscarinic acetylcholine receptor M2	CHRM2	P08172	CHEMBL211	Family A G protein-coupled receptor	0	0 / 1
Acetylcholinesterase	ACHE	P22303	CHEMBL220	Hydrolase	0	0 / 1
Norepinephrine transporter	SLC6A2	P23975	CHEMBL222	Electrochemical transporter	0	0 / 1
Serotonin transporter	SLC6A4	P31645	CHEMBL228	Electrochemical transporter	0	0 / 1
Cytochrome P450 2C19	CYP2C19	P33261	CHEMBL3622	Cytochrome P450	0	0 / 1
Androgen Receptor (by homology)	AR	P10275	CHEMBL1871	Nuclear receptor	0	0 / 1
Anandamide amidohydrolase	FAAH	O00519	CHEMBL2243	Enzyme	0	0 / 2
Vanilloid receptor	TRPV1	Q8NER1	CHEMBL4794	Voltage-gated ion channel	0	0 / 1

## Sheet: Aromandendrene
SwissTargetPrediction
Target	Common name	Uniprot ID	ChEMBL ID	Target Class	Probability*	Known actives (3D/2D)
11-beta-hydroxysteroid dehydrogenase 1	HSD11B1	P28845	CHEMBL4235	Enzyme	0	0 / 7
C-X-C chemokine receptor type 3	CXCR3	P49682	CHEMBL4441	Family A G protein-coupled receptor	0	1 / 0
UDP-glucuronosyltransferase 2B7	UGT2B7	P16662	CHEMBL4370	Enzyme	0	0 / 6
Peroxisome proliferator-activated receptor alpha	PPARA	Q07869	CHEMBL239	Nuclear receptor	0	1 / 1
Cannabinoid receptor 2	CNR2	P34972	CHEMBL253	Family A G protein-coupled receptor	0	1 / 1
Monoamine oxidase B	MAOB	P27338	CHEMBL2039	Oxidoreductase	0	1 / 0
Testis-specific androgen-binding protein	SHBG	P04278	CHEMBL3305	Secreted protein	0	1 / 0
Monoglyceride lipase	MGLL	Q99685	CHEMBL4191	Enzyme	0	1 / 0
Serotonin 2a (5-HT2a) receptor	HTR2A	P28223	CHEMBL224	Family A G protein-coupled receptor	0	1 / 0
LXR-alpha	NR1H3	Q13133	CHEMBL2808	Nuclear receptor	0	0 / 1

## Sheet: β-Sesquiphellanderene
Target	Uniprot ID	Gene Code	ChEMBL ID	By Homology	Probability	Number of sim. cmpds (3D)	Number of sim. cmpds (D2)	Target Class
Androgen receptor	P10275	AR	CHEMBL1871	No	0.35	3	65	Transcription Factor
Estrogen receptor	P03372	ESR1	CHEMBL206	No	0.33	1	46	Transcription Factor
Estrogen receptor beta	Q92731	ESR2	CHEMBL242	No	0.33	1	46	Transcription Factor
DNA topoisomerase 2-alpha	P11388	TOP2A	CHEMBL1806	No	0.3	1	1	Enzyme
DNA topoisomerase 2-beta	Q02880	TOP2B	CHEMBL3396	Yes	0.3	1	1	Enzyme
Sodium-dependent noradrenaline transporter	P23975	SLC6A2	CHEMBL222	No	0.23	3	2	Transporter
Sodium-dependent dopamine transporter	Q01959	SLC6A3	CHEMBL238	Yes	0.23	3	2	Transporter
Microtubule-associated protein tau	P10636	MAPT	CHEMBL1293224	No	0.21	9	7	Unclassified
Cholinesterase	P06276	BCHE	CHEMBL1914	Yes	0.21	2	1	Enzyme
Acetylcholinesterase	P22303	ACHE	CHEMBL220	No	0.21	2	1	Enzyme
Muscarinic acetylcholine receptor M2	P08172	CHRM2	CHEMBL211	No	0.21	1	1	Membrane receptor
Muscarinic acetylcholine receptor M4	P08173	CHRM4	CHEMBL1821	No	0.21	1	1	Membrane receptor
Muscarinic acetylcholine receptor M5	P08912	CHRM5	CHEMBL2035	No	0.21	1	1	Membrane receptor
Muscarinic acetylcholine receptor M1	P11229	CHRM1	CHEMBL216	No	0.21	1	1	Membrane receptor
Muscarinic acetylcholine receptor M3	P20309	CHRM3	CHEMBL245	No	0.21	1	1	Membrane receptor

## Sheet: Naphthalene, 1,2,3,4,4a,7-hexah
SwissTargetPrediction
Target	Common name	Uniprot ID	ChEMBL ID	Target Class	Probability*	Known actives (3D/2D)
Cytochrome P450 19A1	CYP19A1	P11511	CHEMBL1978	Cytochrome P450	0.0428942	0 / 148
Peroxisome proliferator-activated receptor alpha	PPARA	Q07869	CHEMBL239	Nuclear receptor	0.0428942	1 / 9
Cannabinoid receptor 2	CNR2	P34972	CHEMBL253	Family A G protein-coupled receptor	0.0428942	1 / 2
T-cell protein-tyrosine phosphatase	PTPN2	P17706	CHEMBL3807	Phosphatase	0.0428942	0 / 13
Vanilloid receptor	TRPV1	Q8NER1	CHEMBL4794	Voltage-gated ion channel	0.0428942	0 / 2
C-X-C chemokine receptor type 3	CXCR3	P49682	CHEMBL4441	Family A G protein-coupled receptor	0	1 / 0
Androgen Receptor	AR	P10275	CHEMBL1871	Nuclear receptor	0	0 / 51
Estrogen receptor alpha	ESR1	P03372	CHEMBL206	Nuclear receptor	0	0 / 33
Estrogen receptor beta	ESR2	Q92731	CHEMBL242	Nuclear receptor	0	0 / 39
Monoamine oxidase B	MAOB	P27338	CHEMBL2039	Oxidoreductase	0	1 / 0
Testis-specific androgen-binding protein	SHBG	P04278	CHEMBL3305	Secreted protein	0	1 / 11
Nuclear receptor subfamily 1 group I member 3 (by homology)	NR1I3	Q14994	CHEMBL5503	Nuclear receptor	0	0 / 2
Cannabinoid receptor 1 (by homology)	CNR1	P21554	CHEMBL218	Family A G protein-coupled receptor	0	0 / 22
Anandamide amidohydrolase	FAAH	O00519	CHEMBL2243	Enzyme	0	0 / 13
Serotonin 2a (5-HT2a) receptor	HTR2A	P28223	CHEMBL224	Family A G protein-coupled receptor	0	1 / 0
Fatty acid binding protein adipocyte	FABP4	P15090	CHEMBL2083	Fatty acid binding protein family	0	0 / 3
Cyclooxygenase-1	PTGS1	P23219	CHEMBL221	Oxidoreductase	0	0 / 2
Peroxisome proliferator-activated receptor gamma	PPARG	P37231	CHEMBL235	Nuclear receptor	0	0 / 9
Fatty acid binding protein muscle	FABP3	P05413	CHEMBL3344	Fatty acid binding protein family	0	0 / 4
Peroxisome proliferator-activated receptor delta	PPARD	Q03181	CHEMBL3979	Nuclear receptor	0	0 / 6
Free fatty acid receptor 1	FFAR1	O14842	CHEMBL4422	Family A G protein-coupled receptor	0	0 / 2
Muscarinic acetylcholine receptor M2	CHRM2	P08172	CHEMBL211	Family A G protein-coupled receptor	0	0 / 1
Acetylcholinesterase	ACHE	P22303	CHEMBL220	Hydrolase	0	0 / 1
Norepinephrine transporter	SLC6A2	P23975	CHEMBL222	Electrochemical transporter	0	0 / 1
Serotonin transporter	SLC6A4	P31645	CHEMBL228	Electrochemical transporter	0	0 / 1
Cytochrome P450 2C19	CYP2C19	P33261	CHEMBL3622	Cytochrome P450	0	0 / 1
Serine/threonine-protein kinase PLK1	PLK1	P53350	CHEMBL3024	Kinase	0	0 / 1
Adenosine A1 receptor	ADORA1	P30542	CHEMBL226	Family A G protein-coupled receptor	0	0 / 1
Adenosine A2a receptor	ADORA2A	P29274	CHEMBL251	Family A G protein-coupled receptor	0	0 / 1
Adenosine A3 receptor	ADORA3	P0DMS8	CHEMBL256	Family A G protein-coupled receptor	0	0 / 1
Cytosolic phospholipase A2	PLA2G4A	P47712	CHEMBL3816	Enzyme	0	0 / 2
Butyrylcholinesterase	BCHE	P06276	CHEMBL1914	Hydrolase	0	0 / 1
Protein-tyrosine phosphatase 1B	PTPN1	P18031	CHEMBL335	Phosphatase	0	0 / 14
Zinc finger protein GLI2	GLI2	P10070	CHEMBL5119	Transcription factor	0	0 / 1
Zinc finger protein GLI1	GLI1	P08151	CHEMBL5461	Transcription factor	0	0 / 1
Arachidonate 5-lipoxygenase	ALOX5	P09917	CHEMBL215	Oxidoreductase	0	0 / 7
Phospholipase A2 group 1VB	PLA2G4B	P0C869	CHEMBL4136	Enzyme	0	0 / 1
Cytosolic phospholipase A2 gamma	PLA2G4C	Q9UP65	CHEMBL4834	Enzyme	0	0 / 1
LXR-alpha	NR1H3	Q13133	CHEMBL2808	Nuclear receptor	0	0 / 11
Peptidyl-prolyl cis-trans isomerase NIMA-interacting 1	PIN1	Q13526	CHEMBL2288	Enzyme	0	1 / 0
Cytochrome P450 1A2	CYP1A2	P05177	CHEMBL3356	Cytochrome P450	0	1 / 0
UDP-glucuronosyltransferase 2B7	UGT2B7	P16662	CHEMBL4370	Enzyme	0	0 / 2
Nuclear receptor ROR-gamma	RORC	P51449	CHEMBL1741186	Nuclear receptor	0	0 / 9
Sterol regulatory element-binding protein 2	SREBF2	Q12772	CHEMBL1795166	Unclassified protein	0	0 / 1
Niemann-Pick C1-like protein 1	NPC1L1	Q9UHC9	CHEMBL2027	Other membrane protein	0	0 / 4
Cathepsin D	CTSD	P07339	CHEMBL2581	Protease	0	0 / 1
Cytochrome P450 17A1	CYP17A1	P05093	CHEMBL3522	Cytochrome P450	0	0 / 9
HMG-CoA reductase	HMGCR	P04035	CHEMBL402	Oxidoreductase	0	0 / 3
Cytochrome P450 51 (by homology)	CYP51A1	Q16850	CHEMBL3849	Cytochrome P450	0	0 / 2
DNA polymerase beta (by homology)	POLB	P06746	CHEMBL2392	Enzyme	0	0 / 3
Steroid 5-alpha-reductase 1	SRD5A1	P18405	CHEMBL1787	Oxidoreductase	0	0 / 1
Steroid 5-alpha-reductase 2	SRD5A2	P31213	CHEMBL1856	Oxidoreductase	0	0 / 1
Mineralocorticoid receptor	NR3C2	P08235	CHEMBL1994	Nuclear receptor	0	0 / 4
Glucocorticoid receptor	NR3C1	P04150	CHEMBL2034	Nuclear receptor	0	0 / 7
Progesterone receptor	PGR	P06401	CHEMBL208	Nuclear receptor	0	0 / 5
Corticosteroid binding globulin	SERPINA6	P08185	CHEMBL2421	Secreted protein	0	0 / 7
Sigma opioid receptor	SIGMAR1	Q99720	CHEMBL287	Membrane receptor	0	0 / 1
Pregnane X receptor	NR1I2	O75469	CHEMBL3401	Nuclear receptor	0	0 / 2
Estradiol 17-beta-dehydrogenase 3	HSD17B3	P37058	CHEMBL4234	Enzyme	0	0 / 1
Fatty acid-binding protein, liver (by homology)	FABP1	P07148	CHEMBL5421	Fatty acid binding protein family	0	0 / 3
Interleukin-6	IL6	P05231	CHEMBL1795129	Secreted protein	0	0 / 1
Protein-tyrosine phosphatase 1C	PTPN6	P29350	CHEMBL3166	Phosphatase	0	0 / 1
ADAM17	ADAM17	P78536	CHEMBL3706	Protease	0	0 / 1
Nitric oxide synthase, inducible	NOS2	P35228	CHEMBL4481	Enzyme	0	0 / 1
Glutamine synthetase	GLUL	P15104	CHEMBL4612	Ligase	0	0 / 1
G-protein coupled bile acid receptor 1	GPBAR1	Q8TDU6	CHEMBL5409	Family A G protein-coupled receptor	0	0 / 1
Monoglyceride lipase	MGLL	Q99685	CHEMBL4191	Enzyme	0	2 / 1
C-C chemokine receptor type 5	CCR5	P51681	CHEMBL274	Family A G protein-coupled receptor	0	0 / 1
Telomerase reverse transcriptase	TERT	O14746	CHEMBL2916	Enzyme	0	0 / 1
Fatty acid binding protein epidermal	FABP5	Q01469	CHEMBL3674	Fatty acid binding protein family	0	0 / 1
Squalene monooxygenase	SQLE	Q14534	CHEMBL3592	Enzyme	0	0 / 2
Carboxylesterase 2	CES2	O00748	CHEMBL3180	Enzyme	0	0 / 2
Prolyl endopeptidase	PREP	P48147	CHEMBL3202	Protease	0	0 / 1
Prostaglandin E synthase	PTGES	O14684	CHEMBL5658	Enzyme	0	0 / 5
Acyl coenzyme A:cholesterol acyltransferase	CES1	P23141	CHEMBL2265	Enzyme	0	0 / 2
Acyl-CoA desaturase	SCD	O00767	CHEMBL5555	Enzyme	0	0 / 1
Protein kinase C alpha	PRKCA	P17252	CHEMBL299	Kinase	0	0 / 1
RAS guanyl releasing protein 3	RASGRP3	Q8IV61	CHEMBL3638	Other cytosolic protein	0	0 / 1
Nuclear receptor ROR-alpha	RORA	P35398	CHEMBL5868	Nuclear receptor	0	0 / 2
DNA topoisomerase I	TOP1	P11387	CHEMBL1781	Isomerase	0	0 / 2
Plasma retinol-binding protein	RBP4	P02753	CHEMBL3100	Secreted protein	0	0 / 1
Transient receptor potential cation channel subfamily A member 1	TRPA1	O75762	CHEMBL6007	Voltage-gated ion channel	0	0 / 1
Phosphodiesterase 4D	PDE4D	Q08499	CHEMBL288	Phosphodiesterase	0	0 / 1
Receptor-type tyrosine-protein phosphatase F (LAR)	PTPRF	P10586	CHEMBL3521	Membrane receptor	0	0 / 1
11-beta-hydroxysteroid dehydrogenase 1	HSD11B1	P28845	CHEMBL4235	Enzyme	0	0 / 1
Phospholipase A2 group 1B	PLA2G1B	P04054	CHEMBL4426	Enzyme	0	0 / 1
Dual specificity phosphatase Cdc25B	CDC25B	P30305	CHEMBL4804	Phosphatase	0	0 / 1
Low molecular weight phosphotyrosine protein phosphatase	ACP1	P24666	CHEMBL4903	Phosphatase	0	0 / 1
Glucose-6-phosphate 1-dehydrogenase	G6PD	P11413	CHEMBL5347	Enzyme	0	0 / 1
Aldo-keto reductase family 1 member B10	AKR1B10	O60218	CHEMBL5983	Enzyme	0	0 / 2

## Sheet: Germacrene D
SwissTargetPrediction
Target	Common name	Uniprot ID	ChEMBL ID	Target Class	Probability*	Known actives (3D/2D)
Peroxisome proliferator-activated receptor alpha	PPARA	Q07869	CHEMBL239	Nuclear receptor	0.052424	1 / 3
Cannabinoid receptor 2	CNR2	P34972	CHEMBL253	Family A G protein-coupled receptor	0.052424	1 / 1
Adenosine A1 receptor	ADORA1	P30542	CHEMBL226	Family A G protein-coupled receptor	0.0428942	0 / 1
Adenosine A2a receptor	ADORA2A	P29274	CHEMBL251	Family A G protein-coupled receptor	0.0428942	0 / 1
Adenosine A3 receptor	ADORA3	P0DMS8	CHEMBL256	Family A G protein-coupled receptor	0.0428942	0 / 3
Androgen Receptor	AR	P10275	CHEMBL1871	Nuclear receptor	0.0428942	0 / 24
Cytochrome P450 19A1	CYP19A1	P11511	CHEMBL1978	Cytochrome P450	0.0428942	0 / 109
Estrogen receptor alpha	ESR1	P03372	CHEMBL206	Nuclear receptor	0.0428942	0 / 16
Estrogen receptor beta	ESR2	Q92731	CHEMBL242	Nuclear receptor	0.0428942	0 / 17
Monoamine oxidase B	MAOB	P27338	CHEMBL2039	Oxidoreductase	0	1 / 0
C-X-C chemokine receptor type 3	CXCR3	P49682	CHEMBL4441	Family A G protein-coupled receptor	0	1 / 0
LXR-alpha	NR1H3	Q13133	CHEMBL2808	Nuclear receptor	0	0 / 11
Plasma retinol-binding protein	RBP4	P02753	CHEMBL3100	Secreted protein	0	0 / 1
Retinoic acid receptor gamma	RARG	P13631	CHEMBL2003	Nuclear receptor	0	0 / 10
Retinoic acid receptor beta	RARB	P10826	CHEMBL2008	Nuclear receptor	0	0 / 9
Retinoic acid receptor alpha	RARA	P10276	CHEMBL2055	Nuclear receptor	0	0 / 12
Protein-tyrosine phosphatase 1B	PTPN1	P18031	CHEMBL335	Phosphatase	0	0 / 6
Serotonin 2a (5-HT2a) receptor	HTR2A	P28223	CHEMBL224	Family A G protein-coupled receptor	0	1 / 0
Anandamide amidohydrolase	FAAH	O00519	CHEMBL2243	Enzyme	0	0 / 8
Vanilloid receptor	TRPV1	Q8NER1	CHEMBL4794	Voltage-gated ion channel	0	0 / 2
Lanosterol synthase	LSS	P48449	CHEMBL3593	Enzyme	0	0 / 3
Squalene monooxygenase	SQLE	Q14534	CHEMBL3592	Enzyme	0	0 / 4
Vitamin D receptor	VDR	P11473	CHEMBL1977	Nuclear receptor	0	0 / 22
Monoglyceride lipase	MGLL	Q99685	CHEMBL4191	Enzyme	0	2 / 0
Nuclear receptor subfamily 1 group I member 3 (by homology)	NR1I3	Q14994	CHEMBL5503	Nuclear receptor	0	0 / 2
Retinoid X receptor gamma (by homology)	RXRG	P48443	CHEMBL2004	Nuclear receptor	0	0 / 5
Retinoid X receptor alpha	RXRA	P19793	CHEMBL2061	Nuclear receptor	0	0 / 13
Muscarinic acetylcholine receptor M2	CHRM2	P08172	CHEMBL211	Family A G protein-coupled receptor	0	0 / 1
Acetylcholinesterase	ACHE	P22303	CHEMBL220	Hydrolase	0	0 / 1
Norepinephrine transporter	SLC6A2	P23975	CHEMBL222	Electrochemical transporter	0	0 / 1
Serotonin transporter	SLC6A4	P31645	CHEMBL228	Electrochemical transporter	0	0 / 1
Cytochrome P450 2C19	CYP2C19	P33261	CHEMBL3622	Cytochrome P450	0	0 / 1
DNA topoisomerase I	TOP1	P11387	CHEMBL1781	Isomerase	0	0 / 2
Butyrylcholinesterase	BCHE	P06276	CHEMBL1914	Hydrolase	0	0 / 1
Nuclear receptor ROR-gamma	RORC	P51449	CHEMBL1741186	Nuclear receptor	0	0 / 7
Serotonin 2b (5-HT2b) receptor	HTR2B	P41595	CHEMBL1833	Family A G protein-coupled receptor	0	0 / 2
Retinoid X receptor beta	RXRB	P28702	CHEMBL1870	Nuclear receptor	0	0 / 2
Alpha-2b adrenergic receptor	ADRA2B	P18089	CHEMBL1942	Family A G protein-coupled receptor	0	0 / 1
MAP kinase p38 alpha	MAPK14	Q16539	CHEMBL260	Kinase	0	0 / 1
Nuclear receptor ROR-beta	RORB	Q92753	CHEMBL3091268	Nuclear receptor	0	0 / 1
MAP kinase ERK2	MAPK1	P28482	CHEMBL4040	Kinase	0	0 / 2
Nuclear receptor ROR-alpha	RORA	P35398	CHEMBL5868	Nuclear receptor	0	0 / 1
DNA topoisomerase II alpha	TOP2A	P11388	CHEMBL1806	Isomerase	0	0 / 1
TNF-alpha	TNF	P01375	CHEMBL1825	Secreted protein	0	0 / 1
Progesterone receptor	PGR	P06401	CHEMBL208	Nuclear receptor	0	0 / 4
Acyl coenzyme A:cholesterol acyltransferase	CES1	P23141	CHEMBL2265	Enzyme	0	0 / 3
Mannose-6-phosphate isomerase	MPI	P34949	CHEMBL2758	Isomerase	0	0 / 1
Carboxylesterase 2	CES2	O00748	CHEMBL3180	Enzyme	0	0 / 2
T-cell protein-tyrosine phosphatase	PTPN2	P17706	CHEMBL3807	Phosphatase	0	0 / 1
Arachidonate 5-lipoxygenase	ALOX5	P09917	CHEMBL215	Oxidoreductase	0	0 / 5
Cyclooxygenase-1	PTGS1	P23219	CHEMBL221	Oxidoreductase	0	0 / 1
Leukotriene B4 receptor 1	LTB4R	Q15722	CHEMBL3911	Family A G protein-coupled receptor	0	0 / 2
Dual specificity phosphatase Cdc25A	CDC25A	P30304	CHEMBL3775	Phosphatase	0	0 / 1
Glycine receptor subunit alpha-1	GLRA1	P23415	CHEMBL5845	Ligand-gated ion channel	0	0 / 1
Sterol regulatory element-binding protein 2	SREBF2	Q12772	CHEMBL1795166	Unclassified protein	0	0 / 1
Niemann-Pick C1-like protein 1	NPC1L1	Q9UHC9	CHEMBL2027	Other membrane protein	0	0 / 2
Fatty acid binding protein adipocyte	FABP4	P15090	CHEMBL2083	Fatty acid binding protein family	0	0 / 1
Peroxisome proliferator-activated receptor gamma	PPARG	P37231	CHEMBL235	Nuclear receptor	0	0 / 4
Cathepsin D	CTSD	P07339	CHEMBL2581	Protease	0	0 / 1
Telomerase reverse transcriptase	TERT	O14746	CHEMBL2916	Enzyme	0	0 / 1
Fatty acid binding protein muscle	FABP3	P05413	CHEMBL3344	Fatty acid binding protein family	0	0 / 1
Cytochrome P450 17A1	CYP17A1	P05093	CHEMBL3522	Cytochrome P450	0	0 / 5
Fatty acid binding protein epidermal	FABP5	Q01469	CHEMBL3674	Fatty acid binding protein family	0	0 / 1
Peroxisome proliferator-activated receptor delta	PPARD	Q03181	CHEMBL3979	Nuclear receptor	0	0 / 2
HMG-CoA reductase	HMGCR	P04035	CHEMBL402	Oxidoreductase	0	0 / 2
Fatty acid-binding protein, liver	FABP1	P07148	CHEMBL5421	Fatty acid binding protein family	0	0 / 2
Cannabinoid receptor 1 (by homology)	CNR1	P21554	CHEMBL218	Family A G protein-coupled receptor	0	0 / 1
Cytochrome P450 51 (by homology)	CYP51A1	Q16850	CHEMBL3849	Cytochrome P450	0	0 / 1
Zinc finger protein GLI2	GLI2	P10070	CHEMBL5119	Transcription factor	0	0 / 1
Zinc finger protein GLI1	GLI1	P08151	CHEMBL5461	Transcription factor	0	0 / 1
UDP-glucuronosyltransferase 2B7	UGT2B7	P16662	CHEMBL4370	Enzyme	0	0 / 2
Steroid 5-alpha-reductase 1	SRD5A1	P18405	CHEMBL1787	Oxidoreductase	0	0 / 1
Steroid 5-alpha-reductase 2	SRD5A2	P31213	CHEMBL1856	Oxidoreductase	0	0 / 1
Mineralocorticoid receptor	NR3C2	P08235	CHEMBL1994	Nuclear receptor	0	0 / 3
Glucocorticoid receptor	NR3C1	P04150	CHEMBL2034	Nuclear receptor	0	0 / 3
Corticosteroid binding globulin	SERPINA6	P08185	CHEMBL2421	Secreted protein	0	0 / 4
Sigma opioid receptor	SIGMAR1	Q99720	CHEMBL287	Membrane receptor	0	0 / 1
Pregnane X receptor	NR1I2	O75469	CHEMBL3401	Nuclear receptor	0	0 / 2
Estradiol 17-beta-dehydrogenase 3	HSD17B3	P37058	CHEMBL4234	Enzyme	0	0 / 1
Acyl-CoA desaturase	SCD	O00767	CHEMBL5555	Enzyme	0	0 / 1
DNA polymerase beta (by homology)	POLB	P06746	CHEMBL2392	Enzyme	0	0 / 1
Testis-specific androgen-binding protein	SHBG	P04278	CHEMBL3305	Secreted protein	0	1 / 8

## Sheet: α-Funebrene
SwissTargetPrediction
Target	Common name	Uniprot ID	ChEMBL ID	Target Class	Probability*	Known actives (3D/2D)
Peroxisome proliferator-activated receptor alpha	PPARA	Q07869	CHEMBL239	Nuclear receptor	0.0714808	1 / 7
Cannabinoid receptor 2	CNR2	P34972	CHEMBL253	Family A G protein-coupled receptor	0.0714808	1 / 1
Androgen Receptor (by homology)	AR	P10275	CHEMBL1871	Nuclear receptor	0.0428942	0 / 58
Cytochrome P450 19A1	CYP19A1	P11511	CHEMBL1978	Cytochrome P450	0.0428942	0 / 178
Estrogen receptor alpha	ESR1	P03372	CHEMBL206	Nuclear receptor	0.0428942	0 / 34
Muscarinic acetylcholine receptor M2	CHRM2	P08172	CHEMBL211	Family A G protein-coupled receptor	0.0428942	0 / 1
Norepinephrine transporter	SLC6A2	P23975	CHEMBL222	Electrochemical transporter	0.0428942	0 / 1
Serotonin transporter	SLC6A4	P31645	CHEMBL228	Electrochemical transporter	0.0428942	0 / 1
Cytochrome P450 2C19	CYP2C19	P33261	CHEMBL3622	Cytochrome P450	0.0428942	0 / 1
Anandamide amidohydrolase	FAAH	O00519	CHEMBL2243	Enzyme	0.0428942	0 / 10
Vanilloid receptor	TRPV1	Q8NER1	CHEMBL4794	Voltage-gated ion channel	0.0428942	0 / 2
Butyrylcholinesterase	BCHE	P06276	CHEMBL1914	Hydrolase	0	0 / 2
Protein-tyrosine phosphatase 1B	PTPN1	P18031	CHEMBL335	Phosphatase	0	0 / 26
Nuclear receptor ROR-gamma	RORC	P51449	CHEMBL1741186	Nuclear receptor	0	0 / 10
Sterol regulatory element-binding protein 2	SREBF2	Q12772	CHEMBL1795166	Unclassified protein	0	0 / 1
Niemann-Pick C1-like protein 1	NPC1L1	Q9UHC9	CHEMBL2027	Other membrane protein	0	0 / 7
Estrogen receptor beta	ESR2	Q92731	CHEMBL242	Nuclear receptor	0	0 / 42
Cathepsin D	CTSD	P07339	CHEMBL2581	Protease	0	0 / 1
LXR-alpha	NR1H3	Q13133	CHEMBL2808	Nuclear receptor	0	0 / 16
Cytochrome P450 17A1	CYP17A1	P05093	CHEMBL3522	Cytochrome P450	0	0 / 28
HMG-CoA reductase	HMGCR	P04035	CHEMBL402	Oxidoreductase	0	0 / 3
Cytochrome P450 51 (by homology)	CYP51A1	Q16850	CHEMBL3849	Cytochrome P450	0	0 / 2
Nuclear receptor subfamily 1 group I member 3 (by homology)	NR1I3	Q14994	CHEMBL5503	Nuclear receptor	0	0 / 2
Steroid 5-alpha-reductase 1	SRD5A1	P18405	CHEMBL1787	Oxidoreductase	0	0 / 2
Steroid 5-alpha-reductase 2	SRD5A2	P31213	CHEMBL1856	Oxidoreductase	0	0 / 3
Mineralocorticoid receptor	NR3C2	P08235	CHEMBL1994	Nuclear receptor	0	0 / 4
Glucocorticoid receptor	NR3C1	P04150	CHEMBL2034	Nuclear receptor	0	0 / 6
Progesterone receptor	PGR	P06401	CHEMBL208	Nuclear receptor	0	0 / 7
Corticosteroid binding globulin	SERPINA6	P08185	CHEMBL2421	Secreted protein	0	0 / 13
Sigma opioid receptor	SIGMAR1	Q99720	CHEMBL287	Membrane receptor	0	0 / 2
Pregnane X receptor	NR1I2	O75469	CHEMBL3401	Nuclear receptor	0	0 / 2
Estradiol 17-beta-dehydrogenase 3	HSD17B3	P37058	CHEMBL4234	Enzyme	0	0 / 1
Fatty acid-binding protein, liver (by homology)	FABP1	P07148	CHEMBL5421	Fatty acid binding protein family	0	0 / 2
Acetylcholinesterase	ACHE	P22303	CHEMBL220	Hydrolase	0	1 / 1
C-X-C chemokine receptor type 3	CXCR3	P49682	CHEMBL4441	Family A G protein-coupled receptor	0	1 / 0
Cyclooxygenase-1	PTGS1	P23219	CHEMBL221	Oxidoreductase	0	0 / 2
UDP-glucuronosyltransferase 2B7	UGT2B7	P16662	CHEMBL4370	Enzyme	0	0 / 4
Lanosterol synthase	LSS	P48449	CHEMBL3593	Enzyme	0	0 / 2
Monoamine oxidase B	MAOB	P27338	CHEMBL2039	Oxidoreductase	0	1 / 0
T-cell protein-tyrosine phosphatase	PTPN2	P17706	CHEMBL3807	Phosphatase	0	0 / 14
Plasma retinol-binding protein	RBP4	P02753	CHEMBL3100	Secreted protein	0	0 / 1
Protein-tyrosine phosphatase 1C	PTPN6	P29350	CHEMBL3166	Phosphatase	0	0 / 1
Prostaglandin E synthase	PTGES	O14684	CHEMBL5658	Enzyme	0	0 / 7
Nuclear receptor ROR-alpha	RORA	P35398	CHEMBL5868	Nuclear receptor	0	0 / 4
Squalene monooxygenase	SQLE	Q14534	CHEMBL3592	Enzyme	0	0 / 4
Fatty acid binding protein adipocyte	FABP4	P15090	CHEMBL2083	Fatty acid binding protein family	0	0 / 2
Peroxisome proliferator-activated receptor gamma	PPARG	P37231	CHEMBL235	Nuclear receptor	0	0 / 5
Telomerase reverse transcriptase	TERT	O14746	CHEMBL2916	Enzyme	0	0 / 1
Fatty acid binding protein muscle	FABP3	P05413	CHEMBL3344	Fatty acid binding protein family	0	0 / 4
Fatty acid binding protein epidermal	FABP5	Q01469	CHEMBL3674	Fatty acid binding protein family	0	0 / 1
Peroxisome proliferator-activated receptor delta	PPARD	Q03181	CHEMBL3979	Nuclear receptor	0	0 / 4
Cannabinoid receptor 1 (by homology)	CNR1	P21554	CHEMBL218	Family A G protein-coupled receptor	0	0 / 4
C-C chemokine receptor type 5	CCR5	P51681	CHEMBL274	Family A G protein-coupled receptor	0	0 / 1
Glucose-6-phosphate 1-dehydrogenase	G6PD	P11413	CHEMBL5347	Enzyme	0	0 / 2
Acyl coenzyme A:cholesterol acyltransferase	CES1	P23141	CHEMBL2265	Enzyme	0	0 / 2
Acyl-CoA desaturase	SCD	O00767	CHEMBL5555	Enzyme	0	0 / 1
Testis-specific androgen-binding protein	SHBG	P04278	CHEMBL3305	Secreted protein	0	1 / 29
Carboxylesterase 2	CES2	O00748	CHEMBL3180	Enzyme	0	0 / 1
Prolyl endopeptidase	PREP	P48147	CHEMBL3202	Protease	0	0 / 1
Protein farnesyltransferase	FNTA FNTB	P49354 P49356	CHEMBL2094108	Enzyme	0	0 / 1
DNA topoisomerase I	TOP1	P11387	CHEMBL1781	Isomerase	0	0 / 2
Dopamine transporter	SLC6A3	Q01959	CHEMBL238	Electrochemical transporter	0	0 / 1
Adenosine A3 receptor	ADORA3	P0DMS8	CHEMBL256	Family A G protein-coupled receptor	0	0 / 4
MAP kinase ERK1	MAPK3	P27361	CHEMBL3385	Kinase	0	0 / 1
Dual specificity phosphatase Cdc25A	CDC25A	P30304	CHEMBL3775	Phosphatase	0	0 / 3
Transient receptor potential cation channel subfamily A member 1	TRPA1	O75762	CHEMBL6007	Voltage-gated ion channel	0	0 / 1
DNA polymerase beta (by homology)	POLB	P06746	CHEMBL2392	Enzyme	0	0 / 4
LXR-beta	NR1H2	P55055	CHEMBL4093	Nuclear receptor	0	0 / 1
Phosphodiesterase 4D	PDE4D	Q08499	CHEMBL288	Phosphodiesterase	0	0 / 1
Receptor-type tyrosine-protein phosphatase F (LAR)	PTPRF	P10586	CHEMBL3521	Membrane receptor	0	0 / 1
11-beta-hydroxysteroid dehydrogenase 1	HSD11B1	P28845	CHEMBL4235	Enzyme	0	0 / 7
Phospholipase A2 group 1B	PLA2G1B	P04054	CHEMBL4426	Enzyme	0	0 / 1
Dual specificity phosphatase Cdc25B	CDC25B	P30305	CHEMBL4804	Phosphatase	0	0 / 2
Low molecular weight phosphotyrosine protein phosphatase	ACP1	P24666	CHEMBL4903	Phosphatase	0	0 / 1
Aldo-keto reductase family 1 member B10	AKR1B10	O60218	CHEMBL5983	Enzyme	0	0 / 5
11-beta-hydroxysteroid dehydrogenase 2	HSD11B2	P80365	CHEMBL3746	Enzyme	0	0 / 5
Nitric oxide synthase, inducible (by homology)	NOS2	P35228	CHEMBL4481	Enzyme	0	0 / 4
Anti-estrogen binding site (AEBS) (by homology)	DHCR7	Q9UBM7	CHEMBL2169735	Enzyme	0	0 / 1
Prostanoid EP1 receptor (by homology)	PTGER1	P34995	CHEMBL1811	Family A G protein-coupled receptor	0	0 / 1
Prostanoid EP2 receptor (by homology)	PTGER2	P43116	CHEMBL1881	Family A G protein-coupled receptor	0	0 / 1
Free fatty acid receptor 1	FFAR1	O14842	CHEMBL4422	Family A G protein-coupled receptor	0	0 / 1
CD81 antigen	CD81	P60033	CHEMBL1075180	Surface antigen	0	0 / 1
Arachidonate 5-lipoxygenase	ALOX5	P09917	CHEMBL215	Oxidoreductase	0	0 / 3
Protein kinase C eta	PRKCH	P24723	CHEMBL3616	Kinase	0	0 / 1
Protein-tyrosine phosphatase 2C	PTPN11	Q06124	CHEMBL3864	Phosphatase	0	0 / 1
Adenosine A1 receptor	ADORA1	P30542	CHEMBL226	Family A G protein-coupled receptor	0	0 / 1
Adenosine A2a receptor	ADORA2A	P29274	CHEMBL251	Family A G protein-coupled receptor	0	0 / 1
Sphingosine kinase 2	SPHK2	Q9NRA0	CHEMBL3023	Enzyme	0	0 / 1
Cytosolic phospholipase A2	PLA2G4A	P47712	CHEMBL3816	Enzyme	0	0 / 1
Sphingosine kinase 1	SPHK1	Q9NYA1	CHEMBL4394	Enzyme	0	0 / 1
Potassium-transporting ATPase alpha chain 2	ATP12A	P54707	CHEMBL2933	Primary active transporter	0	0 / 1
DNA topoisomerase II alpha	TOP2A	P11388	CHEMBL1806	Isomerase	0	0 / 1
TNF-alpha	TNF	P01375	CHEMBL1825	Secreted protein	0	0 / 1
Thromboxane-A synthase	TBXAS1	P24557	CHEMBL1835	Cytochrome P450	0	0 / 1
Alpha-2a adrenergic receptor	ADRA2A	P08913	CHEMBL1867	Family A G protein-coupled receptor	0	0 / 1
Adrenergic receptor alpha-2	ADRA2C	P18825	CHEMBL1916	Family A G protein-coupled receptor	0	0 / 1
Histamine H3 receptor	HRH3	Q9Y5N1	CHEMBL264	Family A G protein-coupled receptor	0	0 / 1
Serotonin 2b (5-HT2b) receptor	HTR2B	P41595	CHEMBL1833	Family A G protein-coupled receptor	0	0 / 2
Retinoid X receptor beta	RXRB	P28702	CHEMBL1870	Nuclear receptor	0	0 / 2
Alpha-2b adrenergic receptor	ADRA2B	P18089	CHEMBL1942	Family A G protein-coupled receptor	0	0 / 1

[truncated: 10 more sheets: Bicyclogermacrene  , .alpha.-Farnesene, (+)-δ-Cadinene, Espatulenol, (-)-α-Bisabolol oxide B, cedr-8-ene , Chamazulene, Bisaboloxide A, Hexahydrofarnesyl acetone, (Z)-ene-yne-Dicycloether]
