# Supplementary material for: The Mechanism Action of German Chamomile (Matricaria recutita L.) in the Treatment of Eczema: Based on Dose–Effect Weight Coefficient Network Pharmacology
Source: Front Pharmacol. 2021 Sep 30;12:706836. doi: 10.3389/fphar.2021.706836 (PMC8515037; doi:10.3389/fphar.2021.706836)
Supplement: Supplementary file 2 [file DataSheet3.xlsx]

## Sheet: BP（Biological Process）
original Biological Process
ID	Description	BgRatio	pvalue	p.adjust	qvalue	geneID	Count	SCORE
GO:0150076	neuroinflammatory response	75/18670	1.51e-09	1.56e-06	1e-06	MMP3/MAPT/MMP9/CTSC/IL6/NAMPT	6	74.52
GO:0022617	extracellular matrix disassembly	81/18670	2.42e-09	1.56e-06	1e-06	MMP1/MMP3/MMP9/IL6/MMP12/ADAMTS4	6	77.89
GO:1904645	response to amyloid-beta	54/18670	1.89e-08	8.12e-06	5.19e-06	MMP3/MMP9/MMP12/NAMPT/VCAM1	5	53.88
GO:0042102	positive regulation of T cell proliferation	95/18670	3.31e-07	0.000106724	6.83e-05	JAK3/PRKCQ/ZAP70/IL6/VCAM1	5	68.31
GO:0150077	regulation of neuroinflammatory response	41/18670	4.57e-07	0.000115923	7.42e-05	MMP3/MMP9/CTSC/IL6	4	47.25
GO:0030574	collagen catabolic process	47/18670	7.99e-07	0.000115923	7.42e-05	MMP1/MMP3/MMP9/MMP12	4	65.14
GO:0032963	collagen metabolic process	115/18670	8.57e-07	0.000115923	7.42e-05	MMP1/MMP3/MMP9/IL6/MMP12	5	65.8
GO:0001774	microglial cell activation	48/18670	8.71e-07	0.000115923	7.42e-05	MAPT/CTSC/IL6/NAMPT	4	40.02
GO:0002269	leukocyte activation involved in inflammatory response	48/18670	8.71e-07	0.000115923	7.42e-05	MAPT/CTSC/IL6/NAMPT	4	40.02
GO:0019722	calcium-mediated signaling	218/18670	8.98e-07	0.000115923	7.42e-05	CXCR3/ZAP70/MAPT/CCR5/CCR1/VCAM1	6	88.2
GO:0030198	extracellular matrix organization	368/18670	1.17e-06	0.000128451	8.22e-05	MMP1/MMP3/MMP9/IL6/MMP12/ADAMTS4/VCAM1	7	89.98
GO:0043062	extracellular structure organization	369/18670	1.19e-06	0.000128451	8.22e-05	MMP1/MMP3/MMP9/IL6/MMP12/ADAMTS4/VCAM1	7	89.98
GO:0050671	positive regulation of lymphocyte proliferation	130/18670	1.57e-06	0.000150681	9.64e-05	JAK3/PRKCQ/ZAP70/IL6/VCAM1	5	68.31
GO:0032946	positive regulation of mononuclear cell proliferation	131/18670	1.63e-06	0.000150681	9.64e-05	JAK3/PRKCQ/ZAP70/IL6/VCAM1	5	68.31
GO:0061900	glial cell activation	58/18670	1.88e-06	0.000160224	0.000102553	MAPT/CTSC/IL6/NAMPT	4	40.02
GO:0046631	alpha-beta T cell activation	138/18670	2.11e-06	0.000160224	0.000102553	JAK3/PRKCQ/RORC/ZAP70/IL6	5	91.32
GO:0070665	positive regulation of leukocyte proliferation	139/18670	2.19e-06	0.000160224	0.000102553	JAK3/PRKCQ/ZAP70/IL6/VCAM1	5	68.31
GO:0022409	positive regulation of cell-cell adhesion	255/18670	2.23e-06	0.000160224	0.000102553	JAK3/PRKCQ/ALOX15/ZAP70/IL6/VCAM1	6	110.14
GO:0019932	second-messenger-mediated signaling	439/18670	3.78e-06	0.000248993	0.00015937	CXCR3/ZAP70/MAPT/CCR5/CCR1/ADRA1B/VCAM1	7	97.66
GO:0042129	regulation of T cell proliferation	156/18670	3.86e-06	0.000248993	0.00015937	JAK3/PRKCQ/ZAP70/IL6/VCAM1	5	68.31
GO:0060326	cell chemotaxis	304/18670	6.15e-06	0.000377847	0.000241844	CXCR3/PRKCQ/CCR5/IL6/CCR1/VCAM1	6	77.6
GO:0042098	T cell proliferation	184/18670	8.63e-06	0.000491124	0.000314348	JAK3/PRKCQ/ZAP70/IL6/VCAM1	5	68.31
GO:0050900	leukocyte migration	499/18670	8.75e-06	0.000491124	0.000314348	CXCR3/MMP1/ZAP70/CCR5/IL6/CCR1/VCAM1	7	86.72
GO:0035710	CD4-positive, alpha-beta T cell activation	92/18670	1.19e-05	0.000618748	0.000396035	JAK3/PRKCQ/RORC/IL6	4	90.66
GO:0072538	T-helper 17 type immune response	29/18670	1.2e-05	0.000618748	0.000396035	PRKCQ/RORC/IL6	3	51.54
GO:0042116	macrophage activation	95/18670	1.36e-05	0.000648582	0.000415131	MAPT/CTSC/IL6/NAMPT	4	40.02
GO:0050870	positive regulation of T cell activation	202/18670	1.36e-05	0.000648582	0.000415131	JAK3/PRKCQ/ZAP70/IL6/VCAM1	5	68.31
GO:0050670	regulation of lymphocyte proliferation	208/18670	1.56e-05	0.000711816	0.000455604	JAK3/PRKCQ/ZAP70/IL6/VCAM1	5	68.31
GO:0032944	regulation of mononuclear cell proliferation	209/18670	1.6e-05	0.000711816	0.000455604	JAK3/PRKCQ/ZAP70/IL6/VCAM1	5	68.31
GO:0046632	alpha-beta T cell differentiation	101/18670	1.73e-05	0.000743142	0.000475654	JAK3/RORC/ZAP70/IL6	4	75.54
GO:0071887	leukocyte apoptotic process	104/18670	1.94e-05	0.000790376	0.000505887	JAK3/PRKCQ/CCR5/IL6	4	68.96
GO:1903039	positive regulation of leukocyte cell-cell adhesion	218/18670	1.96e-05	0.000790376	0.000505887	JAK3/PRKCQ/ZAP70/IL6/VCAM1	5	68.31
GO:0070663	regulation of leukocyte proliferation	222/18670	2.14e-05	0.000829253	0.000530771	JAK3/PRKCQ/ZAP70/IL6/VCAM1	5	68.31
GO:0002696	positive regulation of leukocyte activation	380/18670	2.18e-05	0.000829253	0.000530771	JAK3/PRKCQ/ZAP70/CTSC/IL6/VCAM1	6	80.4
GO:0050867	positive regulation of cell activation	394/18670	2.68e-05	0.000987427	0.000632011	JAK3/PRKCQ/ZAP70/CTSC/IL6/VCAM1	6	80.4
GO:0022407	regulation of cell-cell adhesion	402/18670	3e-05	0.0010603	0.000678652	JAK3/PRKCQ/ALOX15/ZAP70/IL6/VCAM1	6	110.14
GO:0045785	positive regulation of cell adhesion	403/18670	3.04e-05	0.0010603	0.000678652	JAK3/PRKCQ/ALOX15/ZAP70/IL6/VCAM1	6	110.14
GO:2000107	negative regulation of leukocyte apoptotic process	47/18670	5.22e-05	0.00177278	0.00113469	JAK3/PRKCQ/CCR5	3	68.3
GO:0046651	lymphocyte proliferation	272/18670	5.64e-05	0.00186749	0.0011953	JAK3/PRKCQ/ZAP70/IL6/VCAM1	5	68.31
GO:0032943	mononuclear cell proliferation	274/18670	5.84e-05	0.00188519	0.00120663	JAK3/PRKCQ/ZAP70/IL6/VCAM1	5	68.31
GO:0042110	T cell activation	464/18670	6.67e-05	0.00209888	0.0013434	JAK3/PRKCQ/RORC/ZAP70/IL6/VCAM1	6	103.41
GO:0070661	leukocyte proliferation	298/18670	8.69e-05	0.00267034	0.00170917	JAK3/PRKCQ/ZAP70/IL6/VCAM1	5	68.31
GO:1903037	regulation of leukocyte cell-cell adhesion	304/18670	9.54e-05	0.00286496	0.00183374	JAK3/PRKCQ/ZAP70/IL6/VCAM1	5	68.31
GO:0042093	T-helper cell differentiation	58/18670	9.82e-05	0.0028802	0.0018435	JAK3/RORC/IL6	3	74.88
GO:0002819	regulation of adaptive immune response	160/18670	0.000104398	0.00299506	0.00191702	JAK3/PRKCQ/ALOX15/IL6	4	97.39
GO:0002294	CD4-positive, alpha-beta T cell differentiation involved in immune response	60/18670	0.000108638	0.0030072	0.00192479	JAK3/RORC/IL6	3	74.88
GO:0050863	regulation of T cell activation	314/18670	0.000111103	0.0030072	0.00192479	JAK3/PRKCQ/ZAP70/IL6/VCAM1	5	68.31
GO:0002287	alpha-beta T cell activation involved in immune response	61/18670	0.000114138	0.0030072	0.00192479	JAK3/RORC/IL6	3	74.88
GO:0002293	alpha-beta T cell differentiation involved in immune response	61/18670	0.000114138	0.0030072	0.00192479	JAK3/RORC/IL6	3	74.88
GO:0034614	cellular response to reactive oxygen species	168/18670	0.000126041	0.00325438	0.002083	MMP3/MAPT/MMP9/IL6	4	61.54
GO:0051251	positive regulation of lymphocyte activation	334/18670	0.000148352	0.00375534	0.00240364	JAK3/PRKCQ/ZAP70/IL6/VCAM1	5	68.31
GO:0007159	leukocyte cell-cell adhesion	337/18670	0.000154676	0.00384014	0.00245791	JAK3/PRKCQ/ZAP70/IL6/VCAM1	5	68.31
GO:0002292	T cell differentiation involved in immune response	68/18670	0.000157781	0.00384331	0.00245994	JAK3/RORC/IL6	3	74.88
GO:0030098	lymphocyte differentiation	353/18670	0.000191979	0.00458972	0.00293769	JAK3/RORC/ZAP70/IL6/VCAM1	5	87.63
GO:0043367	CD4-positive, alpha-beta T cell differentiation	74/18670	0.000202813	0.00476057	0.00304705	JAK3/RORC/IL6	3	74.88
GO:0002460	adaptive immune response based on somatic recombination of immune receptors built from immunoglobulin superfamily domains	361/18670	0.000213034	0.00488733	0.00312818	JAK3/PRKCQ/RORC/CTSC/IL6	5	102.75
GO:0010038	response to metal ion	362/18670	0.000215785	0.00488733	0.00312818	CA2/ALOX15/MAPT/MMP9/VCAM1	5	126.49
GO:2000106	regulation of leukocyte apoptotic process	83/18670	0.00028478	0.00627793	0.00401824	JAK3/PRKCQ/CCR5	3	68.3
GO:1901653	cellular response to peptide	385/18670	0.000286908	0.00627793	0.00401824	CA2/JAK3/PRKCQ/NAMPT/VCAM1	5	113.18
GO:0032740	positive regulation of interleukin-17 production	17/18670	0.000312283	0.0067193	0.00430074	PRKCQ/IL6	2	16.44
GO:0070098	chemokine-mediated signaling pathway	88/18670	0.000338351	0.00716085	0.00458336	CXCR3/CCR5/CCR1	3	49.07
GO:0070233	negative regulation of T cell apoptotic process	18/18670	0.00035098	0.00719231	0.0046035	JAK3/PRKCQ	2	54.9
GO:0150078	positive regulation of neuroinflammatory response	18/18670	0.00035098	0.00719231	0.0046035	CTSC/IL6	2	12.75
GO:0030595	leukocyte chemotaxis	224/18670	0.000378555	0.00763616	0.00488759	CXCR3/CCR5/IL6/CCR1	4	49.73
GO:0046634	regulation of alpha-beta T cell activation	93/18670	0.00039803	0.00790549	0.00505998	JAK3/PRKCQ/ZAP70	3	55.56
GO:0030099	myeloid cell differentiation	416/18670	0.00040949	0.00800987	0.00512679	CA2/JAK3/PRKCQ/MMP9/CCR1	5	113.56
GO:0000302	response to reactive oxygen species	232/18670	0.000432286	0.00825896	0.00528622	MMP3/MAPT/MMP9/IL6	4	61.54
GO:1903978	regulation of microglial cell activation	20/18670	0.000435019	0.00825896	0.00528622	CTSC/IL6	2	12.75
GO:1990868	response to chemokine	97/18670	0.000450359	0.00830592	0.00531627	CXCR3/CCR5/CCR1	3	49.07
GO:1990869	cellular response to chemokine	97/18670	0.000450359	0.00830592	0.00531627	CXCR3/CCR5/CCR1	3	49.07
GO:0030217	T cell differentiation	240/18670	0.000491269	0.00893279	0.00571751	JAK3/RORC/ZAP70/IL6	4	75.54
GO:0048661	positive regulation of smooth muscle cell proliferation	101/18670	0.000506919	0.00908934	0.00581771	MMP9/IL6/NAMPT	3	2.44
GO:0031334	positive regulation of protein-containing complex assembly	244/18670	0.00052282	0.00920925	0.00589446	MMP1/ALOX15/MMP3/MAPT	4	126.06
GO:0006925	inflammatory cell apoptotic process	22/18670	0.000527874	0.00920925	0.00589446	CCR5/IL6	2	14.06
GO:0002286	T cell activation involved in immune response	106/18670	0.000583777	0.0100488	0.00643179	JAK3/RORC/IL6	3	74.88
GO:0002407	dendritic cell chemotaxis	24/18670	0.000629492	0.0106931	0.0068442	CCR5/CCR1	2	25.87
GO:0032461	positive regulation of protein oligomerization	25/18670	0.000683572	0.011314	0.00724162	MMP1/MMP3	2	57.85
GO:0045672	positive regulation of osteoclast differentiation	25/18670	0.000683572	0.011314	0.00724162	CA2/CCR1	2	57.77
GO:0072539	T-helper 17 cell differentiation	26/18670	0.000739824	0.0120714	0.00772642	RORC/IL6	2	35.76
GO:1903706	regulation of hemopoiesis	475/18670	0.000748036	0.0120714	0.00772642	CA2/JAK3/PRKCQ/ZAP70/CCR1		113.33
GO:1902105	regulation of leukocyte differentiation	272/18670	0.000785504	0.012416	0.00794698	CA2/JAK3/ZAP70/CCR1	4	97.55
GO:0036336	dendritic cell migration	27/18670	0.000798241	0.012416	0.00794698	CCR5/CCR1	2	25.87
GO:0048143	astrocyte activation	27/18670	0.000798241	0.012416	0.00794698	MAPT/IL6	2	27.04
GO:0051249	regulation of lymphocyte activation	485/18670	0.000821615	0.0126274	0.0080823	JAK3/PRKCQ/ZAP70/IL6/VCAM1	5	68.31
GO:0070229	negative regulation of lymphocyte apoptotic process	29/18670	0.000921545	0.0139966	0.00895868	JAK3/PRKCQ	2	54.9
GO:0034599	cellular response to oxidative stress	302/18670	0.00115852	0.0173176	0.0110843	MMP3/MAPT/MMP9/IL6	4	61.54
GO:0033028	myeloid cell apoptotic process	33/18670	0.00119386	0.0173176	0.0110843	CCR5/IL6	2	14.06
GO:0036314	response to sterol	33/18670	0.00119386	0.0173176	0.0110843	RORC/CCR5	2	48.5
GO:0070232	regulation of T cell apoptotic process	33/18670	0.00119386	0.0173176	0.0110843	JAK3/PRKCQ	2	54.9
GO:0032660	regulation of interleukin-17 production	34/18670	0.00126725	0.0179045	0.0114599	PRKCQ/IL6	2	16.44
GO:0043368	positive T cell selection	34/18670	0.00126725	0.0179045	0.0114599	ZAP70/IL6	2	1.32
GO:0042113	B cell activation	310/18670	0.00127592	0.0179045	0.0114599	JAK3/ZAP70/IL6/VCAM1	4	52.53
GO:0060251	regulation of glial cell proliferation	35/18670	0.00134277	0.0186399	0.0119306	CHRM1/IL6	2	64.97
GO:1902107	positive regulation of leukocyte differentiation	144/18670	0.00141748	0.0192662	0.0123315	CA2/ZAP70/CCR1	3	58.43
GO:0007204	positive regulation of cytosolic calcium ion concentration	319/18670	0.00141773	0.0192662	0.0123315	CXCR3/CCR5/CCR1/ADRA1B	4	58.53
GO:0002822	regulation of adaptive immune response based on somatic recombination of immune receptors built from immunoglobulin superfamily domains	145/18670	0.00144592	0.0193075	0.0123579	JAK3/PRKCQ/IL6	3	55.56
GO:0007568	aging	321/18670	0.00145068	0.0193075	0.0123579	CTSC/BCL2A1/NAMPT/VCAM1	4	31.47
GO:0050691	regulation of defense response to virus by host	37/18670	0.00150011	0.0197616	0.0126486	APOBEC3G/MMP12	2	75.7
GO:0032620	interleukin-17 production	38/18670	0.00158192	0.0205723	0.0131675	PRKCQ/IL6	2	16.44
GO:0050777	negative regulation of immune response	150/18670	0.00159352	0.0205723	0.0131675	JAK3/ALOX15/MMP12	3	87.35
GO:0045124	regulation of bone resorption	40/18670	0.00175182	0.022392	0.0143322	CA2/IL6	2	45.96
GO:0015701	bicarbonate transport	42/18670	0.00193002	0.024428	0.0156354	CA2/CA6	2	66.82
GO:0062197	cellular response to chemical stress	350/18670	0.00199073	0.0248637	0.0159142	MMP3/MAPT/MMP9/IL6	4	61.54
GO:0032459	regulation of protein oligomerization	43/18670	0.00202222	0.0248637	0.0159142	MMP1/MMP3	2	57.85
GO:1904646	cellular response to amyloid-beta	43/18670	0.00202222	0.0248637	0.0159142	NAMPT/VCAM1	2	12.98
GO:0014002	astrocyte development	44/18670	0.00211648	0.0257772	0.0164989	MAPT/IL6	2	27.04
GO:0051480	regulation of cytosolic calcium ion concentration	357/18670	0.00213946	0.0258134	0.0165221	CXCR3/CCR5/CCR1/ADRA1B	4	58.53
GO:0002820	negative regulation of adaptive immune response	45/18670	0.0022128	0.0264511	0.0169303	JAK3/ALOX15	2	80.95
GO:0048660	regulation of smooth muscle cell proliferation	169/18670	0.00223947	0.0265244	0.0169771	MMP9/IL6/NAMPT	3	2.44
GO:0048659	smooth muscle cell proliferation	171/18670	0.00231559	0.0271766	0.0173946	MMP9/IL6/NAMPT	3	2.44
GO:0045058	T cell selection	47/18670	0.00241155	0.0277975	0.017792	ZAP70/IL6	2	1.32
GO:0070231	T cell apoptotic process	47/18670	0.00241155	0.0277975	0.017792	JAK3/PRKCQ	2	54.9
GO:0046850	regulation of bone remodeling	48/18670	0.00251399	0.0286792	0.0183563	CA2/IL6	2	45.96
GO:0050727	regulation of inflammatory response	374/18670	0.00253247	0.0286792	0.0183563	MMP3/MMP9/CTSC/IL6	4	47.25
GO:0010821	regulation of mitochondrion organization	179/18670	0.0026361	0.029338	0.018778	GZMB/MAPT/MMP9	3	45.8
GO:2001235	positive regulation of apoptotic signaling pathway	179/18670	0.0026361	0.029338	0.018778	GZMB/MMP9/CTSC	3	31.51
GO:0002285	lymphocyte activation involved in immune response	181/18670	0.0027203	0.0298126	0.0190818	JAK3/RORC/IL6	3	74.88
GO:0014009	glial cell proliferation	50/18670	0.00272493	0.0298126	0.0190818	CHRM1/IL6	2	64.97
GO:1903708	positive regulation of hemopoiesis	185/18670	0.00289366	0.0313926	0.0200931	CA2/ZAP70/CCR1	3	58.43
GO:0010043	response to zinc ion	53/18670	0.00305644	0.0326105	0.0208726	CA2/VCAM1	2	57.39
GO:0070228	regulation of lymphocyte apoptotic process	53/18670	0.00305644	0.0326105	0.0208726	JAK3/PRKCQ	2	54.9
GO:0002763	positive regulation of myeloid leukocyte differentiation	54/18670	0.00317095	0.0335549	0.0214771	CA2/CCR1	2	57.77
GO:0043030	regulation of macrophage activation	55/18670	0.00328745	0.0345049	0.0220851	CTSC/IL6	2	12.75
GO:2001233	regulation of apoptotic signaling pathway	406/18670	0.0034028	0.0351682	0.0225097	GZMB/MMP9/CTSC/BCL2A1	4	37.91
GO:0002685	regulation of leukocyte migration	196/18670	0.00340513	0.0351682	0.0225097	CXCR3/IL6/CCR1	3	36.33
GO:0002573	myeloid leukocyte differentiation	204/18670	0.00380986	0.0390359	0.0249853	CA2/MMP9/CCR1	3	58.66
GO:0034113	heterotypic cell-cell adhesion	61/18670	0.00402793	0.0406254	0.0260027	ALOX15/VCAM1	2	53.92
GO:2000514	regulation of CD4-positive, alpha-beta T cell activation	61/18670	0.00402793	0.0406254	0.0260027	JAK3/PRKCQ	2	54.9
GO:0043254	regulation of protein-containing complex assembly	429/18670	0.00414204	0.0406684	0.0260302	MMP1/ALOX15/MMP3/MAPT	4	126.06
GO:0032922	circadian regulation of gene expression	62/18670	0.0041582	0.0406684	0.0260302	RORC/NAMPT	2	35.99
GO:0045453	bone resorption	62/18670	0.0041582	0.0406684	0.0260302	CA2/IL6	2	45.96
GO:0046635	positive regulation of alpha-beta T cell activation	62/18670	0.0041582	0.0406684	0.0260302	PRKCQ/ZAP70	2	16.44
GO:0046637	regulation of alpha-beta T cell differentiation	63/18670	0.00429041	0.041646	0.0266559	JAK3/ZAP70	2	39.78
GO:0071241	cellular response to inorganic substance	215/18670	0.00441266	0.0423119	0.0270821	ALOX15/MMP3/MMP9	3	76.33
GO:0045670	regulation of osteoclast differentiation	64/18670	0.00442456	0.0423119	0.0270821	CA2/CCR1	2	57.77
GO:0051222	positive regulation of protein transport	440/18670	0.00453144	0.0426652	0.0273082	CHRM1/GZMB/IL6/MMP12	4	89.9
GO:0002548	monocyte chemotaxis	65/18670	0.00456065	0.0426652	0.0273082	IL6/CCR1	2	13.13
GO:0072678	T cell migration	65/18670	0.00456065	0.0426652	0.0273082	CXCR3/ZAP70	2	23.86
GO:0042108	positive regulation of cytokine biosynthetic process	67/18670	0.00483858	0.0449396	0.028764	PRKCQ/IL6	2	16.44
GO:0006979	response to oxidative stress	451/18670	0.00494498	0.0455997	0.0291865	MMP3/MAPT/MMP9/IL6	4	61.54
GO:0070227	lymphocyte apoptotic process	69/18670	0.00512418	0.0467407	0.0299168	JAK3/PRKCQ	2	54.9
GO:1904951	positive regulation of establishment of protein localization	456/18670	0.00514111	0.0467407	0.0299168	CHRM1/GZMB/IL6/MMP12	4	89.9
GO:0006874	cellular calcium ion homeostasis	458/18670	0.00522102	0.0471352	0.0301693	CXCR3/CCR5/CCR1/ADRA1B	4	58.53
GO:0002697	regulation of immune effector process	462/18670	0.00538334	0.0482632	0.0308913	JAK3/APOBEC3G/IL6/MMP12	4	115.48
GO:1903747	regulation of establishment of protein localization to mitochondrion	72/18670	0.00556682	0.0495639	0.0317238	GZMB/MAPT	2	44.91
After the score is sorted
Description	Description	BgRatio	pvalue	p.adjust	qvalue	geneID	Count	SCORE
GO:0010038	response to metal ion	362/18670	0.000215785	0.00488733	0.00312818	CA2/ALOX15/MAPT/MMP9/VCAM1	5	126.49
GO:0031334	positive regulation of protein-containing complex assembly	244/18670	0.00052282	0.00920925	0.00589446	MMP1/ALOX15/MMP3/MAPT	4	126.06
GO:0043254	regulation of protein-containing complex assembly	429/18670	0.00414204	0.0406684	0.0260302	MMP1/ALOX15/MMP3/MAPT	4	126.06
GO:0002697	regulation of immune effector process	462/18670	0.00538334	0.0482632	0.0308913	JAK3/APOBEC3G/IL6/MMP12	4	115.48
GO:0030099	myeloid cell differentiation	416/18670	0.00040949	0.00800987	0.00512679	CA2/JAK3/PRKCQ/MMP9/CCR1	5	113.56
GO:1903706	regulation of hemopoiesis	475/18670	0.000748036	0.0120714	0.00772642	CA2/JAK3/PRKCQ/ZAP70/CCR1		113.33
GO:1901653	cellular response to peptide	385/18670	0.000286908	0.00627793	0.00401824	CA2/JAK3/PRKCQ/NAMPT/VCAM1	5	113.18
GO:0022409	positive regulation of cell-cell adhesion	255/18670	2.23e-06	0.000160224	0.000102553	JAK3/PRKCQ/ALOX15/ZAP70/IL6/VCAM1	6	110.14
GO:0022407	regulation of cell-cell adhesion	402/18670	3e-05	0.0010603	0.000678652	JAK3/PRKCQ/ALOX15/ZAP70/IL6/VCAM1	6	110.14
GO:0045785	positive regulation of cell adhesion	403/18670	3.04e-05	0.0010603	0.000678652	JAK3/PRKCQ/ALOX15/ZAP70/IL6/VCAM1	6	110.14
GO:0042110	T cell activation	464/18670	6.67e-05	0.00209888	0.0013434	JAK3/PRKCQ/RORC/ZAP70/IL6/VCAM1	6	103.41
GO:0002460	adaptive immune response based on somatic recombination of immune receptors built from immunoglobulin superfamily domains	361/18670	0.000213034	0.00488733	0.00312818	JAK3/PRKCQ/RORC/CTSC/IL6	5	102.75
GO:0019932	second-messenger-mediated signaling	439/18670	3.78e-06	0.000248993	0.00015937	CXCR3/ZAP70/MAPT/CCR5/CCR1/ADRA1B/VCAM1	7	97.66
GO:1902105	regulation of leukocyte differentiation	272/18670	0.000785504	0.012416	0.00794698	CA2/JAK3/ZAP70/CCR1	4	97.55
GO:0002819	regulation of adaptive immune response	160/18670	0.000104398	0.00299506	0.00191702	JAK3/PRKCQ/ALOX15/IL6	4	97.39
GO:0046631	alpha-beta T cell activation	138/18670	2.11e-06	0.000160224	0.000102553	JAK3/PRKCQ/RORC/ZAP70/IL6	5	91.32
GO:0035710	CD4-positive, alpha-beta T cell activation	92/18670	1.19e-05	0.000618748	0.000396035	JAK3/PRKCQ/RORC/IL6	4	90.66
GO:0030198	extracellular matrix organization	368/18670	1.17e-06	0.000128451	8.22e-05	MMP1/MMP3/MMP9/IL6/MMP12/ADAMTS4/VCAM1	7	89.98
GO:0043062	extracellular structure organization	369/18670	1.19e-06	0.000128451	8.22e-05	MMP1/MMP3/MMP9/IL6/MMP12/ADAMTS4/VCAM1	7	89.98
GO:0051222	positive regulation of protein transport	440/18670	0.00453144	0.0426652	0.0273082	CHRM1/GZMB/IL6/MMP12	4	89.9
GO:1904951	positive regulation of establishment of protein localization	456/18670	0.00514111	0.0467407	0.0299168	CHRM1/GZMB/IL6/MMP12	4	89.9
GO:0019722	calcium-mediated signaling	218/18670	8.98e-07	0.000115923	7.42e-05	CXCR3/ZAP70/MAPT/CCR5/CCR1/VCAM1	6	88.2
GO:0030098	lymphocyte differentiation	353/18670	0.000191979	0.00458972	0.00293769	JAK3/RORC/ZAP70/IL6/VCAM1	5	87.63
GO:0050777	negative regulation of immune response	150/18670	0.00159352	0.0205723	0.0131675	JAK3/ALOX15/MMP12	3	87.35
GO:0050900	leukocyte migration	499/18670	8.75e-06	0.000491124	0.000314348	CXCR3/MMP1/ZAP70/CCR5/IL6/CCR1/VCAM1	7	86.72
GO:0002820	negative regulation of adaptive immune response	45/18670	0.0022128	0.0264511	0.0169303	JAK3/ALOX15	2	80.95
GO:0002696	positive regulation of leukocyte activation	380/18670	2.18e-05	0.000829253	0.000530771	JAK3/PRKCQ/ZAP70/CTSC/IL6/VCAM1	6	80.4
GO:0050867	positive regulation of cell activation	394/18670	2.68e-05	0.000987427	0.000632011	JAK3/PRKCQ/ZAP70/CTSC/IL6/VCAM1	6	80.4
GO:0022617	extracellular matrix disassembly	81/18670	2.42e-09	1.56e-06	1e-06	MMP1/MMP3/MMP9/IL6/MMP12/ADAMTS4	6	77.89
GO:0060326	cell chemotaxis	304/18670	6.15e-06	0.000377847	0.000241844	CXCR3/PRKCQ/CCR5/IL6/CCR1/VCAM1	6	77.6
GO:0071241	cellular response to inorganic substance	215/18670	0.00441266	0.0423119	0.0270821	ALOX15/MMP3/MMP9	3	76.33
GO:0050691	regulation of defense response to virus by host	37/18670	0.00150011	0.0197616	0.0126486	APOBEC3G/MMP12	2	75.7
GO:0046632	alpha-beta T cell differentiation	101/18670	1.73e-05	0.000743142	0.000475654	JAK3/RORC/ZAP70/IL6	4	75.54
GO:0030217	T cell differentiation	240/18670	0.000491269	0.00893279	0.00571751	JAK3/RORC/ZAP70/IL6	4	75.54
GO:0042093	T-helper cell differentiation	58/18670	9.82e-05	0.0028802	0.0018435	JAK3/RORC/IL6	3	74.88
GO:0002294	CD4-positive, alpha-beta T cell differentiation involved in immune response	60/18670	0.000108638	0.0030072	0.00192479	JAK3/RORC/IL6	3	74.88
GO:0002287	alpha-beta T cell activation involved in immune response	61/18670	0.000114138	0.0030072	0.00192479	JAK3/RORC/IL6	3	74.88
GO:0002293	alpha-beta T cell differentiation involved in immune response	61/18670	0.000114138	0.0030072	0.00192479	JAK3/RORC/IL6	3	74.88
GO:0002292	T cell differentiation involved in immune response	68/18670	0.000157781	0.00384331	0.00245994	JAK3/RORC/IL6	3	74.88
GO:0043367	CD4-positive, alpha-beta T cell differentiation	74/18670	0.000202813	0.00476057	0.00304705	JAK3/RORC/IL6	3	74.88
GO:0002286	T cell activation involved in immune response	106/18670	0.000583777	0.0100488	0.00643179	JAK3/RORC/IL6	3	74.88
GO:0002285	lymphocyte activation involved in immune response	181/18670	0.0027203	0.0298126	0.0190818	JAK3/RORC/IL6	3	74.88
GO:0150076	neuroinflammatory response	75/18670	1.51e-09	1.56e-06	1e-06	MMP3/MAPT/MMP9/CTSC/IL6/NAMPT	6	74.52
GO:0071887	leukocyte apoptotic process	104/18670	1.94e-05	0.000790376	0.000505887	JAK3/PRKCQ/CCR5/IL6	4	68.96
GO:0042102	positive regulation of T cell proliferation	95/18670	3.31e-07	0.000106724	6.83e-05	JAK3/PRKCQ/ZAP70/IL6/VCAM1	5	68.31
GO:0050671	positive regulation of lymphocyte proliferation	130/18670	1.57e-06	0.000150681	9.64e-05	JAK3/PRKCQ/ZAP70/IL6/VCAM1	5	68.31
GO:0032946	positive regulation of mononuclear cell proliferation	131/18670	1.63e-06	0.000150681	9.64e-05	JAK3/PRKCQ/ZAP70/IL6/VCAM1	5	68.31
GO:0070665	positive regulation of leukocyte proliferation	139/18670	2.19e-06	0.000160224	0.000102553	JAK3/PRKCQ/ZAP70/IL6/VCAM1	5	68.31
GO:0042129	regulation of T cell proliferation	156/18670	3.86e-06	0.000248993	0.00015937	JAK3/PRKCQ/ZAP70/IL6/VCAM1	5	68.31
GO:0042098	T cell proliferation	184/18670	8.63e-06	0.000491124	0.000314348	JAK3/PRKCQ/ZAP70/IL6/VCAM1	5	68.31
GO:0050870	positive regulation of T cell activation	202/18670	1.36e-05	0.000648582	0.000415131	JAK3/PRKCQ/ZAP70/IL6/VCAM1	5	68.31
GO:0050670	regulation of lymphocyte proliferation	208/18670	1.56e-05	0.000711816	0.000455604	JAK3/PRKCQ/ZAP70/IL6/VCAM1	5	68.31
GO:0032944	regulation of mononuclear cell proliferation	209/18670	1.6e-05	0.000711816	0.000455604	JAK3/PRKCQ/ZAP70/IL6/VCAM1	5	68.31
GO:1903039	positive regulation of leukocyte cell-cell adhesion	218/18670	1.96e-05	0.000790376	0.000505887	JAK3/PRKCQ/ZAP70/IL6/VCAM1	5	68.31
GO:0070663	regulation of leukocyte proliferation	222/18670	2.14e-05	0.000829253	0.000530771	JAK3/PRKCQ/ZAP70/IL6/VCAM1	5	68.31
GO:0046651	lymphocyte proliferation	272/18670	5.64e-05	0.00186749	0.0011953	JAK3/PRKCQ/ZAP70/IL6/VCAM1	5	68.31
GO:0032943	mononuclear cell proliferation	274/18670	5.84e-05	0.00188519	0.00120663	JAK3/PRKCQ/ZAP70/IL6/VCAM1	5	68.31
GO:0070661	leukocyte proliferation	298/18670	8.69e-05	0.00267034	0.00170917	JAK3/PRKCQ/ZAP70/IL6/VCAM1	5	68.31
GO:1903037	regulation of leukocyte cell-cell adhesion	304/18670	9.54e-05	0.00286496	0.00183374	JAK3/PRKCQ/ZAP70/IL6/VCAM1	5	68.31
GO:0050863	regulation of T cell activation	314/18670	0.000111103	0.0030072	0.00192479	JAK3/PRKCQ/ZAP70/IL6/VCAM1	5	68.31
GO:0051251	positive regulation of lymphocyte activation	334/18670	0.000148352	0.00375534	0.00240364	JAK3/PRKCQ/ZAP70/IL6/VCAM1	5	68.31
GO:0007159	leukocyte cell-cell adhesion	337/18670	0.000154676	0.00384014	0.00245791	JAK3/PRKCQ/ZAP70/IL6/VCAM1	5	68.31
GO:0051249	regulation of lymphocyte activation	485/18670	0.000821615	0.0126274	0.0080823	JAK3/PRKCQ/ZAP70/IL6/VCAM1	5	68.31
GO:2000107	negative regulation of leukocyte apoptotic process	47/18670	5.22e-05	0.00177278	0.00113469	JAK3/PRKCQ/CCR5	3	68.3
GO:2000106	regulation of leukocyte apoptotic process	83/18670	0.00028478	0.00627793	0.00401824	JAK3/PRKCQ/CCR5	3	68.3
GO:0015701	bicarbonate transport	42/18670	0.00193002	0.024428	0.0156354	CA2/CA6	2	66.82
GO:0032963	collagen metabolic process	115/18670	8.57e-07	0.000115923	7.42e-05	MMP1/MMP3/MMP9/IL6/MMP12	5	65.8
GO:0030574	collagen catabolic process	47/18670	7.99e-07	0.000115923	7.42e-05	MMP1/MMP3/MMP9/MMP12	4	65.14
GO:0060251	regulation of glial cell proliferation	35/18670	0.00134277	0.0186399	0.0119306	CHRM1/IL6	2	64.97
GO:0014009	glial cell proliferation	50/18670	0.00272493	0.0298126	0.0190818	CHRM1/IL6	2	64.97
GO:0034614	cellular response to reactive oxygen species	168/18670	0.000126041	0.00325438	0.002083	MMP3/MAPT/MMP9/IL6	4	61.54
GO:0000302	response to reactive oxygen species	232/18670	0.000432286	0.00825896	0.00528622	MMP3/MAPT/MMP9/IL6	4	61.54
GO:0034599	cellular response to oxidative stress	302/18670	0.00115852	0.0173176	0.0110843	MMP3/MAPT/MMP9/IL6	4	61.54
GO:0062197	cellular response to chemical stress	350/18670	0.00199073	0.0248637	0.0159142	MMP3/MAPT/MMP9/IL6	4	61.54
GO:0006979	response to oxidative stress	451/18670	0.00494498	0.0455997	0.0291865	MMP3/MAPT/MMP9/IL6	4	61.54
GO:0002573	myeloid leukocyte differentiation	204/18670	0.00380986	0.0390359	0.0249853	CA2/MMP9/CCR1	3	58.66
GO:0007204	positive regulation of cytosolic calcium ion concentration	319/18670	0.00141773	0.0192662	0.0123315	CXCR3/CCR5/CCR1/ADRA1B	4	58.53
GO:0051480	regulation of cytosolic calcium ion concentration	357/18670	0.00213946	0.0258134	0.0165221	CXCR3/CCR5/CCR1/ADRA1B	4	58.53
GO:0006874	cellular calcium ion homeostasis	458/18670	0.00522102	0.0471352	0.0301693	CXCR3/CCR5/CCR1/ADRA1B	4	58.53
GO:1902107	positive regulation of leukocyte differentiation	144/18670	0.00141748	0.0192662	0.0123315	CA2/ZAP70/CCR1	3	58.43
GO:1903708	positive regulation of hemopoiesis	185/18670	0.00289366	0.0313926	0.0200931	CA2/ZAP70/CCR1	3	58.43
GO:0032461	positive regulation of protein oligomerization	25/18670	0.000683572	0.011314	0.00724162	MMP1/MMP3	2	57.85
GO:0032459	regulation of protein oligomerization	43/18670	0.00202222	0.0248637	0.0159142	MMP1/MMP3	2	57.85
GO:0045672	positive regulation of osteoclast differentiation	25/18670	0.000683572	0.011314	0.00724162	CA2/CCR1	2	57.77
GO:0002763	positive regulation of myeloid leukocyte differentiation	54/18670	0.00317095	0.0335549	0.0214771	CA2/CCR1	2	57.77
GO:0045670	regulation of osteoclast differentiation	64/18670	0.00442456	0.0423119	0.0270821	CA2/CCR1	2	57.77
GO:0010043	response to zinc ion	53/18670	0.00305644	0.0326105	0.0208726	CA2/VCAM1	2	57.39
GO:0046634	regulation of alpha-beta T cell activation	93/18670	0.00039803	0.00790549	0.00505998	JAK3/PRKCQ/ZAP70	3	55.56
GO:0002822	regulation of adaptive immune response based on somatic recombination of immune receptors built from immunoglobulin superfamily domains	145/18670	0.00144592	0.0193075	0.0123579	JAK3/PRKCQ/IL6	3	55.56
GO:0070233	negative regulation of T cell apoptotic process	18/18670	0.00035098	0.00719231	0.0046035	JAK3/PRKCQ	2	54.9
GO:0070229	negative regulation of lymphocyte apoptotic process	29/18670	0.000921545	0.0139966	0.00895868	JAK3/PRKCQ	2	54.9
GO:0070232	regulation of T cell apoptotic process	33/18670	0.00119386	0.0173176	0.0110843	JAK3/PRKCQ	2	54.9
GO:0070231	T cell apoptotic process	47/18670	0.00241155	0.0277975	0.017792	JAK3/PRKCQ	2	54.9
GO:0070228	regulation of lymphocyte apoptotic process	53/18670	0.00305644	0.0326105	0.0208726	JAK3/PRKCQ	2	54.9
GO:2000514	regulation of CD4-positive, alpha-beta T cell activation	61/18670	0.00402793	0.0406254	0.0260027	JAK3/PRKCQ	2	54.9
GO:0070227	lymphocyte apoptotic process	69/18670	0.00512418	0.0467407	0.0299168	JAK3/PRKCQ	2	54.9
GO:0034113	heterotypic cell-cell adhesion	61/18670	0.00402793	0.0406254	0.0260027	ALOX15/VCAM1	2	53.92
GO:1904645	response to amyloid-beta	54/18670	1.89e-08	8.12e-06	5.19e-06	MMP3/MMP9/MMP12/NAMPT/VCAM1	5	53.88
GO:0042113	B cell activation	310/18670	0.00127592	0.0179045	0.0114599	JAK3/ZAP70/IL6/VCAM1	4	52.53
GO:0072538	T-helper 17 type immune response	29/18670	1.2e-05	0.000618748	0.000396035	PRKCQ/RORC/IL6	3	51.54
GO:0030595	leukocyte chemotaxis	224/18670	0.000378555	0.00763616	0.00488759	CXCR3/CCR5/IL6/CCR1	4	49.73
GO:0070098	chemokine-mediated signaling pathway	88/18670	0.000338351	0.00716085	0.00458336	CXCR3/CCR5/CCR1	3	49.07
GO:1990868	response to chemokine	97/18670	0.000450359	0.00830592	0.00531627	CXCR3/CCR5/CCR1	3	49.07
GO:1990869	cellular response to chemokine	97/18670	0.000450359	0.00830592	0.00531627	CXCR3/CCR5/CCR1	3	49.07
GO:0036314	response to sterol	33/18670	0.00119386	0.0173176	0.0110843	RORC/CCR5	2	48.5
GO:0150077	regulation of neuroinflammatory response	41/18670	4.57e-07	0.000115923	7.42e-05	MMP3/MMP9/CTSC/IL6	4	47.25
GO:0050727	regulation of inflammatory response	374/18670	0.00253247	0.0286792	0.0183563	MMP3/MMP9/CTSC/IL6	4	47.25
GO:0045124	regulation of bone resorption	40/18670	0.00175182	0.022392	0.0143322	CA2/IL6	2	45.96
GO:0046850	regulation of bone remodeling	48/18670	0.00251399	0.0286792	0.0183563	CA2/IL6	2	45.96
GO:0045453	bone resorption	62/18670	0.0041582	0.0406684	0.0260302	CA2/IL6	2	45.96
GO:0010821	regulation of mitochondrion organization	179/18670	0.0026361	0.029338	0.018778	GZMB/MAPT/MMP9	3	45.8
GO:1903747	regulation of establishment of protein localization to mitochondrion	72/18670	0.00556682	0.0495639	0.0317238	GZMB/MAPT	2	44.91
GO:0001774	microglial cell activation	48/18670	8.71e-07	0.000115923	7.42e-05	MAPT/CTSC/IL6/NAMPT	4	40.02
GO:0002269	leukocyte activation involved in inflammatory response	48/18670	8.71e-07	0.000115923	7.42e-05	MAPT/CTSC/IL6/NAMPT	4	40.02
GO:0061900	glial cell activation	58/18670	1.88e-06	0.000160224	0.000102553	MAPT/CTSC/IL6/NAMPT	4	40.02
GO:0042116	macrophage activation	95/18670	1.36e-05	0.000648582	0.000415131	MAPT/CTSC/IL6/NAMPT	4	40.02
GO:0046637	regulation of alpha-beta T cell differentiation	63/18670	0.00429041	0.041646	0.0266559	JAK3/ZAP70	2	39.78
GO:2001233	regulation of apoptotic signaling pathway	406/18670	0.0034028	0.0351682	0.0225097	GZMB/MMP9/CTSC/BCL2A1	4	37.91
GO:0002685	regulation of leukocyte migration	196/18670	0.00340513	0.0351682	0.0225097	CXCR3/IL6/CCR1	3	36.33
GO:0032922	circadian regulation of gene expression	62/18670	0.0041582	0.0406684	0.0260302	RORC/NAMPT	2	35.99
GO:0072539	T-helper 17 cell differentiation	26/18670	0.000739824	0.0120714	0.00772642	RORC/IL6	2	35.76
GO:2001235	positive regulation of apoptotic signaling pathway	179/18670	0.0026361	0.029338	0.018778	GZMB/MMP9/CTSC	3	31.51
GO:0007568	aging	321/18670	0.00145068	0.0193075	0.0123579	CTSC/BCL2A1/NAMPT/VCAM1	4	31.47
GO:0048143	astrocyte activation	27/18670	0.000798241	0.012416	0.00794698	MAPT/IL6	2	27.04
GO:0014002	astrocyte development	44/18670	0.00211648	0.0257772	0.0164989	MAPT/IL6	2	27.04
GO:0002407	dendritic cell chemotaxis	24/18670	0.000629492	0.0106931	0.0068442	CCR5/CCR1	2	25.87
GO:0036336	dendritic cell migration	27/18670	0.000798241	0.012416	0.00794698	CCR5/CCR1	2	25.87
GO:0072678	T cell migration	65/18670	0.00456065	0.0426652	0.0273082	CXCR3/ZAP70	2	23.86
GO:0032740	positive regulation of interleukin-17 production	17/18670	0.000312283	0.0067193	0.00430074	PRKCQ/IL6	2	16.44
GO:0032660	regulation of interleukin-17 production	34/18670	0.00126725	0.0179045	0.0114599	PRKCQ/IL6	2	16.44
GO:0032620	interleukin-17 production	38/18670	0.00158192	0.0205723	0.0131675	PRKCQ/IL6	2	16.44
GO:0046635	positive regulation of alpha-beta T cell activation	62/18670	0.0041582	0.0406684	0.0260302	PRKCQ/ZAP70	2	16.44
GO:0042108	positive regulation of cytokine biosynthetic process	67/18670	0.00483858	0.0449396	0.028764	PRKCQ/IL6	2	16.44
GO:0006925	inflammatory cell apoptotic process	22/18670	0.000527874	0.00920925	0.00589446	CCR5/IL6	2	14.06
GO:0033028	myeloid cell apoptotic process	33/18670	0.00119386	0.0173176	0.0110843	CCR5/IL6	2	14.06
GO:0002548	monocyte chemotaxis	65/18670	0.00456065	0.0426652	0.0273082	IL6/CCR1	2	13.13
GO:1904646	cellular response to amyloid-beta	43/18670	0.00202222	0.0248637	0.0159142	NAMPT/VCAM1	2	12.98
GO:0150078	positive regulation of neuroinflammatory response	18/18670	0.00035098	0.00719231	0.0046035	CTSC/IL6	2	12.75
GO:1903978	regulation of microglial cell activation	20/18670	0.000435019	0.00825896	0.00528622	CTSC/IL6	2	12.75
GO:0043030	regulation of macrophage activation	55/18670	0.00328745	0.0345049	0.0220851	CTSC/IL6	2	12.75
GO:0048661	positive regulation of smooth muscle cell proliferation	101/18670	0.000506919	0.00908934	0.00581771	MMP9/IL6/NAMPT	3	2.44
GO:0048660	regulation of smooth muscle cell proliferation	169/18670	0.00223947	0.0265244	0.0169771	MMP9/IL6/NAMPT	3	2.44
GO:0048659	smooth muscle cell proliferation	171/18670	0.00231559	0.0271766	0.0173946	MMP9/IL6/NAMPT	3	2.44
GO:0043368	positive T cell selection	34/18670	0.00126725	0.0179045	0.0114599	ZAP70/IL6	2	1.32
GO:0045058	T cell selection	47/18670	0.00241155	0.0277975	0.017792	ZAP70/IL6	2	1.32

## Sheet: KEGG
original KEGG Pathway
ID	Description	GeneRatio	BgRatio	pvalue	p.adjust	qvalue	geneID	Count
hsa04659	Th17 cell differentiation	44343	107/8087	2.36365e-05	0.00276547	0.00223924	3718/5588/6097/7535/3569	5	91.32
hsa04657	IL-17 signaling pathway	44313	94/8087	0.000244788	0.0088403	0.00715814	4312/4314/4318/3569	4	59.4
hsa04061	Viral protein interaction with cytokine and cytokine receptor	44313	100/8087	0.000310486	0.0088403	0.00715814	2833/1234/3569/1230	4	49.83
hsa04064	NF-kappa B signaling pathway	44313	104/8087	0.000360778	0.0088403	0.00715814	5588/7535/597/7412	4	34.93
hsa05202	Transcriptional misregulation in cancer	44343	192/8087	0.000377791	0.0088403	0.00715814	3002/4314/4318/3569/597	5	60.09
hsa04668	TNF signaling pathway	44313	112/8087	0.000478506	0.00933086	0.00755535	4314/4318/3569/7412	4	47.25
hsa00910	Nitrogen metabolism	44254	17/8087	0.00141556	0.02366	0.0191579	760/765	2	66.82
hsa04658	Th1 and Th2 cell differentiation	44282	92/8087	0.00342011	0.0412575	0.0334069	3718/5588/7535	3	55.56
hsa04062	Chemokine signaling pathway	44313	192/8087	0.00352268	0.0412575	0.0334069	3718/2833/1234/1230	4	88.29
hsa05323	Rheumatoid arthritis	44282	93/8087	0.00352628	0.0412575	0.0334069	4312/4314/3569	3	58.51
hsa05143	African trypanosomiasis	44254	37/8087	0.00665293	0.0683294	0.0553275	3569/7412	2	12.75
hsa05340	Primary immunodeficiency	44254	38/8087	0.00700815	0.0683294	0.0553275	3718/7535	2	39.78
hsa05219	Bladder cancer	44254	41/8087	0.00812438	0.0711454	0.0576076	4312/4318	2	25.13
hsa05332	Graft-versus-host disease	44254	42/8087	0.00851313	0.0711454	0.0576076	3002/3569	2	19.19
hsa04210	Apoptosis	44282	136/8087	0.0101302	0.0790158	0.0639804	3002/1075/597	3	37.02
hsa05144	Malaria	44254	50/8087	0.0119153	0.0871307	0.0705512	3569/7412	2	12.75
Description	score
hsa04659	Th17 cell differentiation	44343	107/8087	2.36365e-05	0.00276547	0.00223924	3718/5588/6097/7535/3569	5	91.32
hsa04062	Chemokine signaling pathway	44313	192/8087	0.00352268	0.0412575	0.0334069	3718/2833/1234/1230	4	88.29
hsa00910	Nitrogen metabolism	44254	17/8087	0.00141556	0.02366	0.0191579	760/765	2	66.82
hsa05202	Transcriptional misregulation in cancer	44343	192/8087	0.000377791	0.0088403	0.00715814	3002/4314/4318/3569/597	5	60.09
hsa04657	IL-17 signaling pathway	44313	94/8087	0.000244788	0.0088403	0.00715814	4312/4314/4318/3569	4	59.4
hsa05323	Rheumatoid arthritis	44282	93/8087	0.00352628	0.0412575	0.0334069	4312/4314/3569	3	58.51
hsa04658	Th1 and Th2 cell differentiation	44282	92/8087	0.00342011	0.0412575	0.0334069	3718/5588/7535	3	55.56
hsa04061	Viral protein interaction with cytokine and cytokine receptor	44313	100/8087	0.000310486	0.0088403	0.00715814	2833/1234/3569/1230	4	49.83
hsa04668	TNF signaling pathway	44313	112/8087	0.000478506	0.00933086	0.00755535	4314/4318/3569/7412	4	47.25
hsa05340	Primary immunodeficiency	44254	38/8087	0.00700815	0.0683294	0.0553275	3718/7535	2	39.78
hsa04210	Apoptosis	44282	136/8087	0.0101302	0.0790158	0.0639804	3002/1075/597	3	37.02
hsa04064	NF-kappa B signaling pathway	44313	104/8087	0.000360778	0.0088403	0.00715814	5588/7535/597/7412	4	34.93
hsa05219	Bladder cancer	44254	41/8087	0.00812438	0.0711454	0.0576076	4312/4318	2	25.13
hsa05332	Graft-versus-host disease	44254	42/8087	0.00851313	0.0711454	0.0576076	3002/3569	2	19.19
hsa05143	African trypanosomiasis	44254	37/8087	0.00665293	0.0683294	0.0553275	3569/7412	2	12.75
hsa05144	Malaria	44254	50/8087	0.0119153	0.0871307	0.0705512	3569/7412	2	12.75
