# Supplementary material for: The Mechanism Action of German Chamomile (Matricaria recutita L.) in the Treatment of Eczema: Based on Dose–Effect Weight Coefficient Network Pharmacology
Source: Front Pharmacol. 2021 Sep 30;12:706836. doi: 10.3389/fphar.2021.706836 (PMC8515037; doi:10.3389/fphar.2021.706836)
Supplement: Supplementary file 3 [file DataSheet5.xlsx]

## Sheet: eczema targets
gene
FLG
CD14
IL4RA
IFNG
CYP11A1
IL4
STAR
BAX
CCL2
CYP1A1
BCL2
CAT
IL6
TNF
GSR
JUN
CASP8
CXCL8
CEBPB
GSTP1
NFKB1
SPNS1
ANXA1
GCLM
CSF2
GPX1
ESR1
TIMP2
BCL2L11
PPARA
CADM3
LIFR
IL5
TAGLN
CYP17A1
ARNT
BHLHE40
TXNRD1
CD86
IL1B
CASP3
AR
S100A9
TLR4
FAS
ATF3
LDLR
HMOX1
SERPINE2
AKT2
ALDH2
SCARB1
SCD
MAPK1
STAT1
FOS
CELSR3
CLSTN3
FASN
FANCD2
CCL3
CYP1B1
ADORA2B
PRUNE2
IL13
NOS2
PDGFRA
NRXN2
TNC
ABCC3
COL12A1
ZBTB16
INHBA
SH3TC2
GASK1B
MLLT11
DDX25
MEF2C
CDKN1A
GATM
FDFT1
PPARG
SLC5A5
SERPINE1
COLGALT2
CYP7A1
CCND3
CHMP3
MITF
FSHB
CDKN2A
NQO1
UBA1
FKBP5
CHGA
CHST15
GNG11
UPP1
BMP2
SPP1
CD40
SOD1
MCF2L
SOD2
THBS1
CDKN2D
CENPV
EPB41L3
FN1
EMP1
SLC2A1
IL10
ITPRID2
OVAL
CDKN1B
CD80
CTSC
GLUL
MDM1
SCG3
MAFF
DNMT3B
HNRNPU
SULF1
WNT6
CD83
PTGS2
CYCS
SOCS2
CAMK4
SH3GL3
UBASH3B
IL12A
PIK3R1
RASSF4
TSLP
NR3C1
CCL11
SGK1
BOK
ITGA3
TGFB2
TP53
CDH13
ADGRG1
AFF3
KRT17
SLIT2
ACTG2
CRMP1
RFK
RXRB
GSK3B
BID
FABP5
PIEZO2
SPATS2L
IL2
MMP2
TJP2
RELA
MGLL
CTNNB1
CDKN1C
MKI67
ENC1
IL1A
RUNX2
CAV1
AIFM1
INPP1
DDIT4
MAPT
FGFR4
SLC7A11
TGM1
WNT4
CNBP
ITM2A
MAP6
PKIA
HK2
DHCR7
MBP
ABCG2
IL13RA1
TGIF1
PTGR1
HMGCS1
SPRED2
VEGFA
NFIA
TCERG1L
TNFRSF12A
MAPK3
GLIPR2
MCTP1
LONRF2
NSG2
TMBIM6
HSD17B3
PTPRN
KCNB1
TGFB1
AKT1
TSC22D3
WLS
SIK1
HSD3B1
PPARGC1A
RAB20
TCF12
BDNF
ADM
KIF5C
NRG1
STAU2
CYP19A1
ANXA2
LOX
SEMA6D
VSX1
GULP1
OSBPL3
ARHGAP24
SREBF1
SYTL2
SLC1A1
S100A8
TMEM130
LRIG1
AGPAT3
RUNX1T1
SCNN1A
GDF15
DPPA4
CSTA
TNFSF4
CYP3A4
SAMSN1
LAMC2
MYD88
CREB1
FOXO1
PRKACA
DRAM1
PEAR1
SERPINB2
DUSP1
ATP1A3
HSD17B1
SDC4
DAGLA
FEZ1
GM2A
WASF3
DDR1
EPHX2
IER3
CFB
GPX3
CCNB2
HBEGF
RPS15A
SYNM
PPP1R3C
B3GAT1
WHAMM
FAM43A
ID1
TXN
KIRREL3
PLAUR
NFE2L2
RPL31
ANXA4
IL12B
ME1
RBP1
PTEN
ANTXR1
ARID5B
P4HA2
SLIT3
WFDC2
IFFO2
NEFL
NPY1R
IL18
PIR
MMP9
GNG4
RAP1GDS1
TMEM42
ALDOC
DNAJB4
UCP1
OXCT1
ATP1B1
CDKN2B
FOSL2
NEFH
SLC7A7
ANGPTL4
ESR2
GAD1
ATG12
PDE4DIP
EDN1
DLC1
GABBR2
NR1I2
STAT5B
CPT2
SLCO4A1
EFS
LCN2
RTN4R
TPP1
ISG15
FASTK
FILIP1
NCOA6
AHR
GNAS
PGK1
SMARCA2
CXCL10
AKR1C3
APMAP
BICD1
CCDC77
P2RX2
USP13
DEPP1
MAOA
DDIT3
MT1
FSHR
MYC
ATP2B4
CNN1
ETV5
TRIB3
G0S2
ALDH1L2
EIF4G1
MYOF
ATL3
KCNG1
SRXN1
RXRA
SAT1
EIF4G3
EXOC3
PAN2
TMTC3
ALDH5A1
CCL4
ICAM1
IRF1
BTN3A1
KLK13
NR1I3
SHISAL1
ANXA3
SLC40A1
BMP4
CRLS1
KCNJ12
PRNP
CYP2E1
COL4A2
ABHD12
OSTM1
PER2
NLGN2
HSPA5
DUSP5
GNS
NAP1L5
DLD
DNAJB9
ANKRD1
COL17A1
ELMO1
TSPAN33
NAMPT
CAMK2D
DST
ABCC4
CLU
CCNG2
CCR7
MIF
BEX1
FABP7
IFIT2
PLAU
B3GNT5
CLEC2D
EPDR1
MPC1
RTN1
FOXP1
TNFSF9
CTSL
SLC7A5
E2F2
HSPA8
KRT5
HMGCR
SFXN3
SLIT1
UBE2J1
PLAT
ANXA5
PLA2G4A
SLC2A3
HINFP
KLHDC4
NPFFR2
EDIL3
HAS2
NFAT5
RASGRP2
REV3L
TFPI2
TLE2
TMEFF2
TPM1
LHCGR
PPL
ABI3BP
BAIAP2L1
GALNT2
ASAH1
GAPDH
PDE4D
USP2
COL13A1
RTN4RL1
TRPS1
DMD
PAX6
IL1R1
ACTN2
DOCK9
GNAZ
PPA1
PHLDA2
IDI1
CXCL1
LYN
VASP
LHX2
MBNL3
TLE4
DDAH1
ITGA4
IFNB1
ATP6V0D1
EOMES
IDS
MBD2
CEBPD
IGSF21
NXPH1
PDE6B
EBP
GSTM1
BPGM
CHRDL1
IGF2
NELL2
PPARD
SSBP2
VCL
RB1
CPT1A
FRMD6
OGFRL1
PLS1
PSD3
SEMA4D
LDHA
MIRLET7E
ATCAY
BAHCC1
SORCS1
COL5A2
PHLDA3
TIMP1
CDH1
ACTN1
DHRS3
SAA2
NAV1
PCYT2
PEG10
ENO3
RCAN1
KRT8
ANK1
FXYD6
LARP1B
MBNL1
PLEKHB1
ACVR1B
CABLES1
SPINT2
CFLAR
ELMOD2
AHNAK2
CST6
FBP2
POU2F1
NCF2
ZEB1
VCAN
SQSTM1
EFNB1
TACC2
ACTG1
EGLN3
PFKP
BNIP3
KHNYN
RIMBP2
ARHGEF3
FLRT2
GFPT2
GPM6B
NEXN
SLC18A2
MUC5AC
FJX1
HIBADH
CST3
MAPK8
AHDC1
SEMA6B
MIR21
S100A10
VDR
VCAM1
CEMIP2
WWTR1
NOX4
TNFAIP3
C1S
TPM3
CD200
COL18A1
DGKA
ETV1
HDAC3
MEIS2
SMPDL3A
CDK6
ACHE
LPL
SPTBN4
USP46
ALDH3A2
CRIM1
NR0B1
PRKAB2
IFIT1
IL11
SIRT1
DKK1
TBC1D4
APBA2
AREG
GADD45B
SOCS3
CD9
NFKBIZ
FTH1
DHRS9
MSX1
WDHD1
BBC3
NDRG1
CD36
PER1
SC5D
TTR
CASP9
CPT1B
IL1RL1
BCL11A
EPB41L1
RAB3B
MRPL15
RNF157
ABCC2
CBS
PPP1R15A
POMC
DNMT1
APLP2
PLD1
TAX1BP3
ACTA1
ARNTL
NGFR
SOX2
ZFAT
LAMP3
PRICKLE1
ERRFI1
KITLG
ARHGAP18
GAS6
KCNK1
KIZ
CHST6
KAT7
IRS1
ARNT2
CACNA1A
DLK1
ERBB2
TIPARP
MMD
INSIG1
PLAG1
TMCO1
KCNJ2
MAP3K14
NCOA7
TENT5C
CCNA2
CCND2
CREB5
HS6ST1
LY75
TBC1D30
MAN2A2
OSBPL10
ROBO3
SCAF4
B2M
EPCAM
ASS1
CBL
GAD2
MAP2K6
SLC23A2
TGFBR1
PMAIP1
BCL6
BTG1
GATA3
ATXN1
CARHSP1
COL9A1
RTTN
SLC4A7
SOST
STXBP4
BNC1
CDHR1
ISCU
SEZ6L2
CDH3
FBLN2
HILPDA
HSDL2
PPP1R10
PVALB
SMAD3
SNAI2
GPNMB
MYLK
AAMDC
ABCA12
FREM1
ICOSLG
MED30
TRIM32
UNC5A
ZCCHC12
H2AC6
PLEC
SHANK2
IRS2
HDAC1
ADCY7
EIF4A2
LIMA1
SGMS1
TUSC1
VEGFD
BEND6
CTNNA2
PRRG1
RGS8
ACTN3
FBXO21
INPP4A
NR4A1
PLA2G15
SPAG4
ZCCHC14
ITPR2
NRXN1
HSP90AA1
COL1A1
ASPH
LRRFIP1
MFGE8
A4GALT
EBF3
COL4A1
CORO2B
GCLC
DDX5
IL3
PSAP
ABHD2
CCR2
LGALS1
PLK2
VLDLR
EPS8
ISYNA1
PRDM1
RPS6KA1
CLN5
FER
TASOR
PGM1
ACADM
COL1A2
CCL5
FGFR1
ARHGAP19
ELF2
FAM110B
NAT8L
RAPGEF6
RASAL1
REXO2
TMC7
ZIC2
EPHA4
GREM1
LOXL2
MTUS1
AQP3
PDK1
DHCR24
DNAJB1
JUNB
GLI2
HNMT
L1CAM
PLAGL1
AMMECR1
CBX2
DENND1A
HERC4
MRPL1
NUCB1
SNRNP70
PCK1
OLFML3
RFC3
A2M
RHOB
ZFP36
ALAS2
ATP8B1
PPP2R2B
HSPD1
CLIP2
DOCK5
PRKAR1B
SLC30A4
FAT1
SPRY4
MTHFD1L
PHLDA1
SIRT3
ACKR3
HNRNPD
NABP1
NRCAM
SIRT5
ADCY4
BCCIP
BCL9
DNM3
GLIS3
IMPDH1
IRX4
PPM1H
RHEBL1
TTC9
XIRP2
F3
KRT7
OSMR
SHMT1
AK5
CALN1
CD69
GPR37
GRB10
H19
MGAT4B
MRTFA
PROSER2
PTPRC
RAB43
RASEF
RPS27L
GRIN1
STAT3
COTL1
ERO1A
IGFBP5
TUBB2B
MMP1
ASCC3
RGS20
SPTLC3
TBC1D5
UNC13B
AMPD3
C19ORF33
FOXA2
RETSAT
EGFR
EPO
CROT
OPA1
AMPH
AP2A1
ARL8B
CADPS
CCDC88C
CNKSR3
DYNC1I1
ELP4
KLHL4
PRICKLE2
RPS4X
S100A16
TTYH2
TXNDC16
ZFPM2
SOX9
BAMBI
CXCL11
FKBP4
FUS
IER2
ITPR3
LMNA
MPO
ABCA1
CAV2
CNTNAP1
DCLK1
HMGA2
RXRG
TPD52L1
ARIH2
ASTN2
DKK2
LRP10
MGARP
STON2
SUSD2
TMEM163
UNC5C
MYF6
COL6A3
NOTCH2
SDC2
TNFAIP2
HES1
GADD45G
H1-10
NTRK2
RAB6B
CDH5
CPPED1
ECE1
LRIG3
NPR3
PSMB9
PTPRM
TEAD4
HSPH1
PRDX2
ACACA
EGR3
GJA1
GPAT3
MALAT1
OGDH
TUBA1B
LSS
BCL2L13
CDH8
FZD3
HLA-C
IGSF9
KPNA1
MDFIC
NCK1
SFTPA1
SLC35F2
SOX8
TANC1
TMEM30B
TMEM86A
TRIM6
TSPAN2
SRC
ACADL
GATA6
ST6GAL1
CENATAC
ARRB2
HIPK2
KLF6
LAMA3
ADAM22
COL8A2
CXCL6
MAN2B2
ZMYM2
MAPK4
NMI
SIN3A
ALDH1B1
CACNA1C
CTSH
AHRR
AUTS2
REL
RHOC
CSGALNACT1
CYB5R1
KAT6B
KIF21B
MAN1A2
MUC5B
RBM12
TERF1
BTN2A2
PPP1R17
SIX2
BCAT1
NFIB
WDR89
PARP1
KDELR2
MYCL
NDUFA3
OLFML1
SNRPF
SOX5
TMCC3
USP25
WDR4
ACSL5
EIF5
IDH3A
ITGB5
TIMP3
CASP7
MSMO1
ARRDC3
PLTP
TES
WT1
ID3
INSL3
NOTCH1
CCDC68
CLSTN2
GABRA5
MLF1
RCBTB2
SETD5
ST3GAL4
THNSL2
EPHB6
SLFN5
DIO2
GEM
EML6
KCTD2
SPRN
ZBTB6
IL17A
TLR3
HSPA4L
ARAF
C1QTNF6
GNG2
HSPA1A
LARP6
MAP3K12
POLH
PTPN14
BCL2L1
NLRP3
ITGB4
SFRP1
CELSR2
NSG1
PLD3
SEPTIN11
SLC12A5
SORCS2
CHD3
LRPAP1
PCSK9
PEX2
RAB1A
STAT6
STC1
TBC1D15
ZEB2
PRKCB
PRR14L
RASGEF1C
PLIN2
RALYL
LAMP2
MVP
SORL1
TH
LAP3
AIG1
CAPN6
CCDC88A
EFNA5
KMT5B
PLXND1
SEMA6A
TET1
ACACB
TAP1
ACTA2
ADAMTS2
ALPK2
ASIC1
B3GALNT1
CD22
CDS2
FLRT3
INF2
MMP16
NDUFB2
DUSP4
HSPA1B
MTTP
FUT9
LHB
NDUFAF8
ZFP1
PTK2B
DLGAP4
DTNA
HMGCL
ITGAV
MAF
SLC16A3
TUBB4A
CCN2
CCNB1
FOXO3
MET
TJP1
UGT1A6
HK1
RGS16
SLC1A4
BCOR
EHD1
FXN
GCA
GPRC5B
KRT18
MDN1
MYL2
PKM
SAR1B
SCN4B
SLC31A2
SOBP
STAMBPL1
SVEP1
HSPA6
PTHLH
SULF2
DUSP6
TMEM63C
GPR173
MIR106B
TMEM104
FAM124A
FAM161B
UBE2J2
MAFB
HSPA12A
MPZL1
PDE9A
SATB2
SSPN
CDK4
MAGI2
MEX3B
POLR1B
PPFIBP2
RIPK4
RPS14
TIMM17A
TLE3
XRCC4
IGF2R
COL2A1
TFPI
APBB2
CELF1
EPS8L2
FERMT1
INTS6
KCNA5
SPTBN2
BACE1
CAPN2
HEXB
HOXC5
ITGA5
TMEM151A
CAPS2
SNAPC4
MDM2
IGF1
CSF2RA
DCC
FOXC2
HEG1
GALNT3
LMO4
MAP7
PRSS23
AHNAK
POU5F1
PROS1
TUBB2A
NPPB
ARHGAP22
CDC42EP3
CLIP4
COL4A6
IGF2BP3
LPCAT1
PPP1R14B
ROR1
STIM1
TSHZ1
ZCCHC7
CCNE1
GJB2
LIPG
CDH2
TRIB1
ATP9B
HESX1
MRGPRF
PADI3
PCGF2
USP44
ZNF589
FOXJ2
TNRC6C
HSD17B7
MTHFD2
AFAP1
ARAP2
ATP6V0A1
CLCA1
DLX2
DNAJA2
MAN2A1
MCCC2
MID1
MYL6
NBL1
RPL22L1
SGMS2
ZMIZ1
CCND1
ETS1
RND3
SKP2
XRCC1
AKR1C2
CCN1
ADAM9
AP1S2
ARHGAP26
GPR137B
KCNK5
RFTN1
TRIM16
MT1X
ABRAXAS1
FAAP20
KRT75
MIR18A
RPH3A
SPRYD3
CAPN1
HELB
ID2
SCAMP4
SLC26A10
SLC30A1
PCNA
CASP1
FRAS1
REST
SIPA1L2
BTG2
S100A11
CD55
DAPK1
FKBP1B
HSF1
LITAF
FGD4
FLI1
PEA15
PLXNB2
PRPS1
RHOBTB3
SHISA2
SYNGR1
CRB2
IFT140
NVL
PITPNM3
SDK1
ZFYVE27
TXNIP
H2BC21
NOS3
SERPINB1
SFTPB
ABL2
ARL4C
CDON
DPP7
G2E3
LNPEP
NREP
PRDX1
REEP5
TENT5A
TRAF4
UNG
NT5E
CYP1A2
CAMK1D
CCL19
CORO2A
FRMD4A
PRDM16
SLC46A3
TANK
WIPF1
DIDO1
ETFDH
STC2
TMEM35A
FAM216A
KBTBD7
LYPD6B
SLC35F1
TMEM74
TTLL6
ANGPTL7
SFN
NR4A3
DBT
GSTA4
INHA
NFE2L3
PRKAG2
RAB27B
SCARA3
TBX21
UCHL1
CDKN2C
FABP3
IPO5
IVL
JADE1
MEOX1
NPTX1
PDE3A
PSMD7
SKAP2
GCK
HSPA2
SLC25A1
GSTT1
MCTP2
PHF12
TIAM2
AMY1
FAM174A
FCER2
NEUROG1
TUBB3
CDK2
IL6ST
TNFAIP6
VEGFC
CPEB4
FOXP2
GPCPD1
LGALS8
MEST
RHOQ
SRSF3
SSR1
EEF1A1
EFNA1
MIR374A
ALB
TSSK4
AKR1C1
MCM4
CRY2
ELOVL3
GNE
MATN2
SCPEP1
TYRP1
YPEL5
ASTN1
AP3B2
FGFR3
MTMR2
NR6A1
ZC3H4
ABCC10
CALCOCO2
INTS8
JKAMP
KLF5
MIDEAS
MRPS10
ALPL
ASNS
THRB
ADAM19
CD82
CYP51
DCBLD2
FNDC3B
HSD17B4
PTPRO
UBE2D3
OLFR130
OLFR729
HSPB8
ACTR3
AMD1
IL4R
ITGB8
KRT14
LBR
PPM1B
PSMB2
PTPRG
RHOU
RSRC2
ZBTB10
DCLK3
GPX5
IDH1
SYT5
ASB7
MROH1
ABHD17A
CADM2
CMPK1
EVI2B
GALNT14
NDUFAF2
NPAS3
PHYHIP
SPAG6
TOM1L2
CTSD
TGFBI
ADAMTS5
CSF2RB
CXCL16
FZD4
GFRA2
GLA
GRB14
OXTR
SDCBP
SERPINI1
TRP53
HERPUD1
NR3C2
TACSTD2
FXYD5
GLRX
HNRNPC
IRF7
MME
NAV3
ORM2
PDGFRL
SUMO1
TP53I3
RNF123
ACKR2
DGCR2
ENOX1
GALNT13
GTF3C6
MSI1
MYOT
PMEL
RABL6
SALL3
TBX18
TOP3A
C15ORF61
CITED2
TSPO
VSTM2B
COL7A1
DCT
DLL1
IL10RA
NDRG4
SORBS2
CLOCK
FOXC1
KCTD12
SAA3
SPRY1
STEAP1
VSNL1
XRCC6
ZMYND8
PRLR
MT2A
CYP2B6
C6
CLGN
HDAC6
IGF1R
ITGAX
NAV2
PMVK
SUCLG2
TRIO
AGO3
UCK1
CD44
CNRIP1
GAREM1
GRSF1
PLXNA4
RNASEH2C
TM2D3
TMEM150C
TRIM9
UBE2F
NCOA1
NR1D1
PDE4B
CXCL2
DKK3
FNBP1
GPC3
HPCAL1
KRT15
LFNG
RARRES2
SLC16A7
ERBB3
GLS
PRKCA
TNFRSF10B
CHAC1
STS
CPEB2
EDEM1
LIMCH1
OLFM1
ROBO1
COX10
LY6K
MYH8
POU4F1
TMEM245
TMEM59
APOA1
MED23
SCMH1
AOX1
ENO2
NET1
NFIL3
SOD3
THBD
ANTXR2
ESD
HOXA1
RPS27
VGF
CYP26A1
CLDN11
CLMN
DACT1
FXYD7
STMN4
STOM
TTYH1
ARTN
EZR
FST
GH1
INSM1
KLF9
MRRF
OSBPL9
PI16
SLITRK5
ADAM28
LPCAT4
PRPF18
RPS6KA4
SYNE3
FGG
PTGES
TUBA1A
VIM
CACNA2D1
CYFIP2
DFFA
ECM1
GART
HRAS
STAT4
FERMT2
GALE
IFRD1
KIT
TGFB1I1
CASKIN1
CCDC3
H3-3B
LHX9
LRRC3B
MCHR1
MESP1
MIR30E
PACS1
PAGR1
PLD5
POU4F2
SEZ6L
WNK2
EYA3
FAM78A
RNF150
SCEL
TMEM70
TSFM
AEN
ARPC1B
CD81
PNRC1
RPS3
LEP
EP300
MCM6
DHPS
KCNG3
CLDN8
CUL4B
ETFBKMT
F11R
F13A1
GPRC5A
HDAC4
ITFG1
NPY2R
PLCXD3
RBFOX1
TEF
TRNP1
GADD45A
NFKBIA
FMR1
CBLB
KCNQ1
LTA4H
PFKFB4
RAPGEF4
RECK
S100A4
SERPINA3
SORBS1
SPSB1
DPF1
KLK10
AKAP10
BHLHB9
CCNJ
DCAF13
ENSA
FOXL2
GPR87
IFIH1
KCNC1
MRPS33
NCAN
NLK
PAIP2B
PDXK
SMPD1
USP28
USP39
XPNPEP3
YAF2
ZFC3H1
PPRC1
SH3KBP1
SLC5A3
TIA1
VARS2
GRIN2B
GFAP
CRH
OAT
CCL17
CLDN7
ELF3
ELOVL2
FZD7
KIF20B
LAMC1
METTL7A
SYNE1
UQCRC1
HMOX2
MCM2
ABLIM2
ARAP1
BTRC
DMRT1
EOGT
JAKMIP1
LMBR1
LTV1
MFSD1
MRPL35
NKIRAS1
PGS1
SARNP
SH3RF3
TBC1D2B
TMEM263
VAC14
ZNF608
AP3S1
DUSP2
EPHA8
GLIPR1
LSP1
NPC2
PTMA
PXN
RPL6
DNMT3A
FADS2
GOT1
CCL7
DRD2
BHLHE41
CCL22
GUCY1B1
MDK
NASP
TRAF1
COL25A1
NR1H3
AHCYL2
AMOTL1
CDKL2
DUSP11
ELMOD1
GPR55
TRPM3
CACNB1
EGFLAM
HOOK1
MYLPF
PLCXD1
SLC35G2
SPOCK3
EDNRA
FDPS
HSD11B2
IRF9
PRDX5
PSMB1
DYNC1H1
EGLN1
PNPLA3
TFRC
ODC1
C1R
HSD17B6
PLXNA2
RBM3
ALDOA
ACKR1
CD99
DAZL
LRRN1
MARVELD2
MIR132
NPTXR
PTPMT1
RABGGTA
SYNGR3
USP49
KLRG1
KMT2B
PRL
STX8
ZFYVE1
LOXL1
NAP1L1
SERPINB9
THBS2
ABLIM1
FBN2
HPSE
ACLY
DNAJB6
HES6
LPAR1
NRP2
OLFR1180
OLFR134
OLFR1450
POLA1
PRKACB
YAP1
SLC5A7
CABYR
CCDC136
CPVL
LINGO1
MACIR
MEGF10
RNF24
TSHZ2
CA2
HAUS2
METTL21A
METTL8
GPR141
ABCA17
CMBL
CSRNP1
PPP1R3B
RPL13
CASP6
SNAI1
SLC27A1
EFNB2
ELN
PTGER2
SLC4A1
SOX17
APOE
CCNY
CDH23
CDK10
DACH1
G3BP2
GCSH
HGSNAT
KANSL2
MARVELD3
THNSL1
VPS13C
CHCHD7
CLN6
H3C1
SLC35E1
SPOCK2
VTCN1
TPO
INS1
CHRNA3
CRISPLD2
DDX17
G6PD
MT1G
NCAPH
LIF
NR4A2
TGFA
GLDC
PTPRD
UNC5B
CLDN6
ORMDL3
BANK1
CNTFR
RDH12
SLC26A6
SOX7
TDRD3
WDR47
RHOBTB2
XDH
CDO1
GFRA1
IKBKG
INSR
LGALS3
PDLIM1
PMEPA1
PSMA5
SAA1
CPS1
TWIST1
MIRLET7G
ACADVL
DGKI
GGTA1
GUK1
HOMER1
HSPB1
PTGER3
ADGRL4
CLASP2
FGF14
GLMP
KCNN3
MAN1C1
NLGN1
PAICS
SRCIN1
TTLL12
ULK1
ZNF395
BAG6
CACNB4
FLT1
P3H2
SEC61B
SPTB
VEZF1
ATF6
MGST1
TCF7L2
LAMA5
PDGFB
ABCA6
BCL7A
CD47
ESRP1
EXPH5
FRMD5
IGF2BP1
ITPRIPL2
PLEKHH2
PPP4R3B
RAB8A
ATP2C1
BAG5
CCDC85A
HLX
PROCR
RAB18
SLC7A2
TAF13
TGFBR2
TMEM204
ABCB1
CCNE2
CGA
CPE
IGFBP7
PPARGC1B
MIR615
DERL1
MYH1
SHISA6
SLC35D2
SOX10
ACSS3
ALPK1
ARHGEF9
CFAP73
CNMD
COMMD10
DENND1B
FAM163B
GAK
LAMB3
LZTS1
RAB2A
SLC2A5
SLC39A8
SYTL5
TSEN15
VWCE
CCL20
PTK2
ENPP1
FCGR2B
HNRNPH1
JUP
KRT10
RACK1
RTN4
BCL2L10
NUPR1
SQLE
SNHG11
CTNS
CTSF
ISL1
ITM2C
LIPH
MED13
SALL2
SLC16A9
CEP85
CHMP4C
DLX1
EID3
H2AJ
HOOK2
HPDL
OGG1
RPS25
TFB2M
TRAK1
TRIL
USP53
ALOX5AP
FHL1
IFNGR1
LAMB1
PTPRF
EPHA2
ZMAT3
SH2D4A
AGO4
ATP9A
DAGLB
FOXG1
KYAT3
LLGL2
LRRC8B
NHSL1
ORAI1
PCGF5
PLSCR4
RAB25
SLC25A27
ST7
THSD4
VGLL3
CSF3
EGR1
NPY
[truncated: 22,226 more rows]

## Sheet: German chamomile targets
gene
SIGMAR1
LSS
PTGS2
MAOB
CHRM4
TRPA1
CES2
MGLL
CA9
GRIK1
CNR2
NOS1
RXRB
PTGS1
CHRM1
ALOX5
CHRM2
CA2
CA1
GGPS1
ICMT
CA12
NR1H4
HDAC2
OXER1
HCAR2
AOC3
NFE2L2
SQLE
HDAC1
PPARA
PPARD
MDM2
JAK3
METAP2
PSMB2
CXCR3
FASN
MTNR1B
RXRG
GABRA2
MMP13
CTSK
AKR1C3
VHL
PPARG
CHRNA7
MAP2K2
NOS2
GABRA3
APOBEC3A
AKT1
SLC6A4
GABRA5
TSPO
HTR2C
HTR2A
GABRR1
AHCY
CES1
CA4
ACHE
CNR1
CHRM3
RXRA
IGFBP3
TSHR
GABRA1
IDE
CYP2A6
THRB
CHRM5
HTR1A
IGFBP1
TP53
ERBB2
SHBG
NR3C1
GBA
MMP1
LMNA
EGFR
BBOX1
JAK2
RIPK2
ACACB
FAAH
OPRK1
APOBEC3G
CTDSP1
OPRD1
OPRM1
RARG
SLCO1B1
SLCO1B3
ADRA2B
RARB
AR
MAOA
RARA
CYP17A1
ADAM33
ESR2
NPY5R
NR1I3
ATR
NR1H3
ADCY1
MCL1
PRKCQ
BACE1
RORC
PRCP
HTR2B
NOS3
HSD11B1
IGFBP2
UGT2B7
CYP19A1
HMGCR
ESR1
S1PR2
NR5A2
SRD5A1
SRD5A2
ADRA1A
PTPN1
HRH3
GPR55
NPC1L1
P2RX7
HTR4
SREBF2
AVPR1A
CYP2C19
CDC25A
SLC6A2
CYP11B2
ALOX15
CYP11B1
POLA1
ADRA2A
STS
ABCB1
BCHE
CYP1A2
KCNH2
CYP2C9
NR1I2
ALK
TLR9
S1PR5
EHMT2
TRPV1
HIF1A
EBP
HSD11B2
CHRNA4
GRM5
HTR1E
GABRB3
NPY1R
PTAFR
DRD4
ADRA2C
PGR
ATP12A
HSD17B3
SERPINA6
S1PR3
GPBAR1
PDE4B
PRKCH
IGFBP5
CYP2B6
PTPN2
VDR
G6PD
P2RX4
SLC6A3
OPRL1
GLRA1
S1PR1
NFKB1
DRD2
NR3C2
MLNR
CYP24A1
STAT3
DPP4
ATG4B
PIN1
FDFT1
DRD3
CDC25B
DNMT1
FDPS
GZMB
PLA2G1B
KDM4A
PTGES
TRPM8
KCNA5
CYP3A4
NISCH
SENP7
PDE3A
PDE3B
PDE4D
LIPE
FOLH1
PTPN5
ZAP70
CASP3
ADORA2A
PNMT
ADORA3
EPHX1
CDK1
SERPINE1
USP2
GALR3
GSK3A
IGFBP4
KCNA3
KDM1A
GLI1
ICK
GPR18
PTGDR
HTR6
KDR
IMPDH2
GPR35
KISS1R
PSEN1
CDC25C
DRD1
IMPDH1
MMP17
SLC5A7
CASP9
ADORA1
IGFBP6
DRD5
GLI2
S1PR4
HDAC3
SLC22A2
HSD17B1
CYSLTR1
LRRK2
SLC18A3
MAPK1
PDE4A
XBP1
PRKCA
IDO1
PABPC1
CYP2D6
DPP7
HDAC11
ENGASE
DPP8
PTPN11
MAP2K1
DUSP3
GRIA4
PTPN7
HPGD
MMP3
MMP2
TYMS
PLG
ABCC9
TAAR1
HTR1B
HTR1D
MAPK14
AHR
PTGDR2
PIM2
RELA
PLAUR
DHODH
KIF11
RORA
CRHR1
HTR7
SLC5A2
RYR1
C5AR1
MIF
TOP1
PIM1
MAPT
POLB
MPO
DHFR
GMNN
PTK2B
NR5A1
CA6
NR4A1
HSPA1A
EPHX2
KDM2A
NOD1
LPAR3
HDAC6
PDF
GRM2
STAT5B
KDM5C
PTPN6
MMP9
PTPRF
LTA4H
CAPN1
ALOX15B
TERT
PIK3CA
MTOR
MAP3K4
SIK2
EBPL
CREBBP
PIM3
ULK3
GRM4
PDE7A
BLM
CTSC
MTNR1A
EPHA8
CTSS
ERBB3
HMOX1
GLA
RBP4
TLR2
HCRTR2
HCRTR1
CDC7
EPAS1
PRKCD
CTSD
CYP51A1
FABP1
CCR5
FABP4
FABP3
FABP5
PREP
ACP1
AKR1B10
SCD
FNTA FNTB
CD81
MAPK3
NR1H2
DHCR7
PTGER1
PTGER2
FFAR1
SPHK2
PLA2G4A
SPHK1
TOP2A
TNF
TBXAS1
PTGIR
PLK1
PLA2G4B
PLA2G4C
IL6
ADAM17
GLUL
RASGRP3
RORB
MPI
LTB4R
KMT5A
HSD17B2
EIF2AK1
ABHD6
SAE1 UBA2
SLC10A2
LIPA
BRD4
BRD2
BRD3
PSEN2 PSENEN NCSTN APH1A PSEN1 APH1B
TRPV3
PLA2G7
PER2
SCN5A
PIK3CB
SCN9A
CLK4
OXTR
PIK3CD
NPY2R
NQO2
EZH2
PRKDC
BRS3
JAK1
MAPK8
PARP1
PGGT1B
ROCK2
PGGT1B FNTA
CCR1
STK3
CCR9
RHOA
KCNE1 KCNQ1
KCNJ11 ABCC9
IL6ST
MAP3K14
JAK3 JAK1
GCGR
PYGL
GABRB3 GABRA3 GABRG2
GABRB3 GABRG2 GABRA1
GABRB3 GABRG2 GABRA5
GABRA2 GABRB3 GABRG2
PDE10A
TYK2
F2RL3
CHRNA3 CHRNB4
HRH2
ADRA1B
MAPK10
TGFBR1
CCNB3 CDK1 CCNB1 CCNB2
AKR1B1
EPHB4
CDK5R1 CDK5
MKNK1
ALB
PDK2
BCL2L1
BCL2
LDHA
PTGER4
PTGER3
LDHB
VCP
MPG
MAP2
BCL2A1
MMP12
WDR5
GSK3B
GSTA1
CHEK1
FKBP1A
CA5B
ELANE
RASGRP1
ADRB2
ADRB1
ADRB3
PDE9A
AURKA
PRMT3
MAPK11
CCR2
C3AR1
HSD3B1
HSP90AA1
PAOX
TAOK3
GPR88
ALPL
NAMPT
CTSL
TACR1
LDLR
CALCRL RAMP1
GRM1
F2
SLC6A9
SIRT2
PIK3CG
ACACA
NMBR
HSP90AB1
GPR119
PON1
NAAA
CTSH
PRKAG1 PRKAB1 PRKAA2
CTSB
CSF1R
CACNA2D1
SOAT1
MAPK13
AVPR2
PRSS1
CTRC
F10
NAT1
ADORA2B
CCNE2 CDK2 CCNE1
AURKB
ADAMTS5
ADAMTS4
NTRK1
SLC27A4
QPCT
GLP1R
KCNK3
KCNK9
IGF1R
INSR
FGFR1
PDGFRA PDGFRB
FBP1
VCAM1
HRH4
AGPAT2
MMP14
SLC11A2
CDK2
CDK4
MAPK9
RPS6KA5
MME
CCND1 CDK4
CDK1 CCNB1
PDGFRB
CDK2 CCNA1 CCNA2
TDP1
O75342
P18054
ALOXE3
TOP2B
