# Supplementary material for: The Mechanism Action of German Chamomile (Matricaria recutita L.) in the Treatment of Eczema: Based on Dose–Effect Weight Coefficient Network Pharmacology
Source: Front Pharmacol. 2021 Sep 30;12:706836. doi: 10.3389/fphar.2021.706836 (PMC8515037; doi:10.3389/fphar.2021.706836)
Supplement: Supplementary file 4 [file DataSheet1.xlsx]

## Sheet: JAK3
Compound	Pct Total	log P	Weight coefficient	Weight coefficient *Pct Total	Molecular docking score	Final score
trans-β-Ocimene	2.728	3.475	0.999665	2.72709	58.6574	1.56806
γ-Elemene	3.882	4.891	0.999987	3.88195	68.9777	2.62482
α-Copaene	0.756	4.271	0.999946	0.755959	67.3629	0.499183
(-)-Isocomene	0.943	4.599	0.999975	0.942976	58.6968	0.54257
β-Copaene	2.639	4.271	0.999946	2.63886	68.9625	1.7839
Aromandendrene	0.653	4.271	0.999946	0.652965	67.9635	0.435017
β-Sesquiphellanderene	18.527	4.891	0.999987	18.5268	77.0092	13.9856
Naphthalene, 1,2,3,4,4a,7-hexahydro-1,6-dimethyl-4-(1-methylethyl)-	0.661	4.581	0.999974	0.660983	70.0695	0.454004
Germacrene D	4.835	4.891	0.999987	4.83494	67.4368	3.19616
α-Funebrene	1.452	4.415	0.999962	1.45194	56.6576	0.806396
Bicyclogermacrene	4.822	4.725	0.999981	4.82191	65.4033	3.09143
.alpha.-Farnesene	6.573	5.202	0.999994	6.57296	79.3559	5.11305
(+)-δ-Cadinene	0.86	4.725	0.999981	0.859984	70.1395	0.59128
Espatulenol	2.127	3.386	0.999589	2.12613	69.037	1.43884
(-)-α-Bisabolol oxide B	9.46	3.441	0.999638	9.45657	74.8824	6.94151
cedr-8-ene	9.606	4.415	0.999962	9.60563	64.0103	6.02721
Chamazulene	6.398	3.971	0.999893	6.39732	70.5336	4.42317
Bisaboloxide A	12.071	3.441	0.999638	12.0666	76.2238	9.01606
Hexahydrofarnesyl acetone	0.888	6.015	0.999999	0.887999	101.954	0.887477
(Z)-ene-yne-Dicycloether	6.074	1.99	0.989871	12.0873	84.5335	10.0161
positive drug					score
Tofacitinib					102.014

## Sheet: RORC
Compound	Pct Total	log P	Weight coefficient	Weight coefficient *Pct Total	Molecular docking score	Final score
trans-β-Ocimene	2.728	3.475	0.999665	2.72709	78.8278	1.64399
γ-Elemene	3.882	4.891	0.999987	3.88195	93.0982	2.76384
α-Copaene	0.756	4.271	0.999946	0.755959	86.3719	0.499336
(-)-Isocomene	0.943	4.599	0.999975	0.942976	68.7136	0.495525
β-Copaene	2.639	4.271	0.999946	2.63886	86.0677	1.73691
Aromandendrene	0.653	4.271	0.999946	0.652965	88.3089	0.440977
β-Sesquiphellanderene	18.527	4.891	0.999987	18.5268	111.16	15.7496
Naphthalene, 1,2,3,4,4a,7-hexahydro-1,6-dimethyl-4-(1-methylethyl)-	0.661	4.581	0.999974	0.660983	96.876	0.489698
Germacrene D	4.835	4.891	0.999987	4.83494	92.4144	3.41706
α-Funebrene	1.452	4.415	0.999962	1.45194	65.0891	0.722736
Bicyclogermacrene	4.822	4.725	0.999981	4.82191	74.0762	2.73161
.alpha.-Farnesene	6.573	5.202	0.999994	6.57296	112.37	5.6485
(+)-δ-Cadinene	0.86	4.725	0.999981	0.859984	97.5504	0.641566
Espatulenol	2.127	3.386	0.999589	2.12613	88.8462	1.44461
(-)-α-Bisabolol oxide B	9.46	3.441	0.999638	9.45657	101.444	7.33638
cedr-8-ene	9.606	4.415	0.999962	9.60563	78.311	5.75268
Chamazulene	6.398	3.971	0.999893	6.39732	99.5492	4.87032
Bisaboloxide A	12.071	3.441	0.999638	12.0666	92.8225	8.56566
Hexahydrofarnesyl acetone	0.888	6.015	0.999999	0.887999	131.696	0.894349
(Z)-ene-yne-Dicycloether	6.074	1.99	0.989871	12.0873	106.689	9.8621
positive drug					score
Resveratrol					130.761

## Sheet: PRKCQ
Compound	Pct Total	log P	Weight coefficient	Weight coefficient *Pct Total	Molecular docking score	Final score
trans-β-Ocimene	2.728	3.475	0.999665	2.72709	59.9821	1.8154
γ-Elemene	3.882	4.891	0.999987	3.88195	73.4138	3.16286
α-Copaene	0.756	4.271	0.999946	0.755959	72.0821	0.604754
(-)-Isocomene	0.943	4.599	0.999975	0.942976	60.4488	0.632617
β-Copaene	2.639	4.271	0.999946	2.63886	71.567	2.09595
Aromandendrene	0.653	4.271	0.999946	0.652965	68.3723	0.495476
β-Sesquiphellanderene	18.527	4.891	0.999987	18.5268	83.9428	17.2598
Naphthalene, 1,2,3,4,4a,7-hexahydro-1,6-dimethyl-4-(1-methylethyl)-	0.661	4.581	0.999974	0.660983	75.1808	0.551505
Germacrene D	4.835	4.891	0.999987	4.83494	69.2028	3.71336
α-Funebrene	1.452	4.415	0.999962	1.45194	62.961	1.01455
Bicyclogermacrene	4.822	4.725	0.999981	4.82191	67.8156	3.62912
.alpha.-Farnesene	6.573	5.202	0.999994	6.57296	81.7879	5.96626
(+)-δ-Cadinene	0.86	4.725	0.999981	0.859984	71.2188	0.679732
Espatulenol	2.127	3.386	0.999589	2.12613	72.5989	1.71306
(-)-α-Bisabolol oxide B	9.46	3.441	0.999638	9.45657	82.3298	8.64059
cedr-8-ene	9.606	4.415	0.999962	9.60563	65.2763	6.95879
Chamazulene	6.398	3.971	0.999893	6.39732	66.5777	4.72693
Bisaboloxide A	12.071	3.441	0.999638	12.0666	74.5606	9.985
Hexahydrofarnesyl acetone	0.888	6.015	0.999999	0.887999	100.797	0.993374
(Z)-ene-yne-Dicycloether	6.074	1.99	0.989871	12.0873	79.1203	10.6137
positive drug					score
Tamoxifen					90.1047

## Sheet: IL6
Compound	Pct Total	log P	Weight coefficient	Weight coefficient *Pct Total	Molecular docking score	Final score
trans-β-Ocimene	2.728	3.475	0.999665	2.72709	56.6975	1.72535
γ-Elemene	3.882	4.891	0.999987	3.88195	57.5215	2.49169
α-Copaene	0.756	4.271	0.999946	0.755959	fail	0
(-)-Isocomene	0.943	4.599	0.999975	0.942976	fail	0
β-Copaene	2.639	4.271	0.999946	2.63886	fail	0
Aromandendrene	0.653	4.271	0.999946	0.652965	63.6212	0.46356
β-Sesquiphellanderene	18.527	4.891	0.999987	18.5268	71.8514	14.8542
Naphthalene, 1,2,3,4,4a,7-hexahydro-1,6-dimethyl-4-(1-methylethyl)-	0.661	4.581	0.999974	0.660983	59.7924	0.441012
Germacrene D	4.835	4.891	0.999987	4.83494	fail	0
α-Funebrene	1.452	4.415	0.999962	1.45194	fail	0
Bicyclogermacrene	4.822	4.725	0.999981	4.82191	49.2545	2.6502
.alpha.-Farnesene	6.573	5.202	0.999994	6.57296	74.4658	5.46175
(+)-δ-Cadinene	0.86	4.725	0.999981	0.859984	51.524	0.494441
Espatulenol	2.127	3.386	0.999589	2.12613	64.171	1.52245
(-)-α-Bisabolol oxide B	9.46	3.441	0.999638	9.45657	73.8299	7.79077
cedr-8-ene	9.606	4.415	0.999962	9.60563	fail	0
Chamazulene	6.398	3.971	0.999893	6.39732	fail	0
Bisaboloxide A	12.071	3.441	0.999638	12.0666	fail	0
Hexahydrofarnesyl acetone	0.888	6.015	0.999999	0.887999	76.7121	0.760135
(Z)-ene-yne-Dicycloether	6.074	1.99	0.989871	12.0873	61.4969	8.2946
postive drug					score
Polaprezinc					89.616

## Sheet: ZAP70
Compound	Pct Total	log P	Weight coefficient	Weight coefficient *Pct Total	Molecular docking score	Final score
trans-β-Ocimene	2.728	3.475	0.999665	2.72709	61.0731	1.21974
γ-Elemene	3.882	4.891	0.999987	3.88195	75.586	2.14887
α-Copaene	0.756	4.271	0.999946	0.755959	72.8506	0.40332
(-)-Isocomene	0.943	4.599	0.999975	0.942976	61.6405	0.425681
β-Copaene	2.639	4.271	0.999946	2.63886	73.1567	1.4138
Aromandendrene	0.653	4.271	0.999946	0.652965	67.5162	0.322861
β-Sesquiphellanderene	18.527	4.891	0.999987	18.5268	85.8247	11.6447
Naphthalene, 1,2,3,4,4a,7-hexahydro-1,6-dimethyl-4-(1-methylethyl)-	0.661	4.581	0.999974	0.660983	75.5889	0.365903
Germacrene D	4.835	4.891	0.999987	4.83494	72.1241	2.55381
α-Funebrene	1.452	4.415	0.999962	1.45194	59.6976	0.634782
Bicyclogermacrene	4.822	4.725	0.999981	4.82191	63.3076	2.23559
.alpha.-Farnesene	6.573	5.202	0.999994	6.57296	90.4995	4.35637
(+)-δ-Cadinene	0.86	4.725	0.999981	0.859984	75.2531	0.47395
Espatulenol	2.127	3.386	0.999589	2.12613	74.2872	1.1567
(-)-α-Bisabolol oxide B	9.46	3.441	0.999638	9.45657	79.019	5.47247
cedr-8-ene	9.606	4.415	0.999962	9.60563	66.6291	4.68714
Chamazulene	6.398	3.971	0.999893	6.39732	75.2394	3.52502
Bisaboloxide A	12.071	3.441	0.999638	12.0666	77.2893	6.83004
Hexahydrofarnesyl acetone	0.888	6.015	0.999999	0.887999	106.363	0.691705
(Z)-ene-yne-Dicycloether	6.074	1.99	0.989871	12.0873	84.1681	7.45063
positive drug					score
Fostamatinib					136.547

## Sheet: summary
JAK3	trans-β-Ocimene	1.56806			JAK3	PRKCQ	RORC	ZAP70	IL6
	Naphthalene, 1,2,3,4,4a,7-hexahydro-1,6-dimethyl-4-(1-methylethyl)-	0.454004		trans-β-Ocimene	1.56806
	Espatulenol	1.43884		Naphthalene, 1,2,3,4,4a,7-hexahydro-1,6-dimethyl-4-(1-methylethyl)-	0.454004		0.489698	0.365903	0.441012
	(-)-α-Bisabolol oxide B	6.94151		Espatulenol	1.43884	1.71306
	Bisaboloxide A	9.01606		(-)-α-Bisabolol oxide B	6.94151
	(Z)-ene-yne-Dicycloether	10.0161		Bisaboloxide A	9.01606
PRKCQ	γ-Elemene	3.16286		(Z)-ene-yne-Dicycloether	10.0161
	α-Copaene	0.604754		γ-Elemene		3.16286	2.76384
	β-Copaene	2.09595		α-Copaene		0.604754	0.499336
	Aromandendrene	0.495476		β-Copaene		2.09595
	Germacrene D	3.71336		Aromandendrene		0.495476
	Espatulenol	1.71306		Germacrene D		3.71336	3.41706
	Hexahydrofarnesyl acetone	0.993374		Hexahydrofarnesyl acetone		0.993374	0.894349
RORC	γ-Elemene	2.76384		(-)-Isocomene			0.495525
	α-Copaene	0.499336		α-Funebrene			0.722736
	(-)-Isocomene	0.495525		Bicyclogermacrene			2.73161
	Naphthalene, 1,2,3,4,4a,7-hexahydro-1,6-dimethyl-4-(1-methylethyl)-	0.489698		(+)-δ-Cadinene			0.641566
	Germacrene D	3.41706		cedr-8-ene			5.75268
	α-Funebrene	0.722736		Chamazulene			4.72371
	Bicyclogermacrene	2.73161
	(+)-δ-Cadinene	0.641566
	cedr-8-ene	5.75268
	Chamazulene	4.87032
	Hexahydrofarnesyl acetone	0.894349
ZAP70	Naphthalene, 1,2,3,4,4a,7-hexahydro-1,6-dimethyl-4-(1-methylethyl)-	0.365903
IL-6	Naphthalene, 1,2,3,4,4a,7-hexahydro-1,6-dimethyl-4-(1-methylethyl)-	0.441012
