# Supplementary material for: The Mechanism Action of German Chamomile (Matricaria recutita L.) in the Treatment of Eczema: Based on Dose–Effect Weight Coefficient Network Pharmacology
Source: Front Pharmacol. 2021 Sep 30;12:706836. doi: 10.3389/fphar.2021.706836 (PMC8515037; doi:10.3389/fphar.2021.706836)
Supplement: Supplementary file 5 [file DataSheet2.xlsx]

## Sheet: trans-β-Ocimene
UniProt_ID	gene
Q99720	SIGMAR1
P48449	LSS
P35354	PTGS2
P27338	MAOB
P08173	CHRM4
O75762	TRPA1
O00748	CES2
Q99685	MGLL
Q16790	CA9
P39086	GRIK1
P34972	CNR2
P29475	NOS1
P28702	RXRB
P23219	PTGS1
P11229	CHRM1
P09917	ALOX5
P08172	CHRM2
P00918	CA2
P00915	CA1
O95749	GGPS1
O60725	ICMT
O43570	CA12
Q96RI1	NR1H4
Q92769	HDAC2
Q8TDS5	OXER1
Q8TDS4	HCAR2
Q16853	AOC3
Q16236	NFE2L2
Q14534	SQLE
Q13547	HDAC1
Q07869	PPARA
Q03181	PPARD
Q00987	MDM2
P52333	JAK3
P50579	METAP2
P49721	PSMB2
P49682	CXCR3
P49327	FASN
P49286	MTNR1B
P48443	RXRG
P47869	GABRA2
P45452	MMP13
P43235	CTSK
P42330	AKR1C3
P40337	VHL
P37231	PPARG
P36544	CHRNA7
P36507	MAP2K2
P35228	NOS2
P34903	GABRA3
P31941	APOBEC3A
P31749	AKT1
P31645	SLC6A4
P31644	GABRA5
P30536	TSPO
P28335	HTR2C
P28223	HTR2A
P24046	GABRR1
P23526	AHCY
P23141	CES1
P22748	CA4
P22303	ACHE
P21554	CNR1
P20309	CHRM3
P19793	RXRA
P17936	IGFBP3
P16473	TSHR
P14867	GABRA1
P14735	IDE
P11509	CYP2A6
P10828	THRB
P08912	CHRM5
P08908	HTR1A
P08833	IGFBP1
P04637	TP53
P04626	ERBB2
P04278	SHBG
P04150	NR3C1
P04062	GBA
P03956	MMP1
P02545	LMNA
P00533	EGFR
O75936	BBOX1
O60674	JAK2
O43353	RIPK2
O00763	ACACB
O00519	FAAH

## Sheet: γ-Elemene
UniProt_ID	gene
P41145	OPRK1
P34972	CNR2
Q9HC16	APOBEC3G
Q9GZU7	CTDSP1
P41143	OPRD1
P35372	OPRM1
P31941	APOBEC3A
P19793	RXRA
P13631	RARG
Q9Y6L6	SLCO1B1
Q9NPD5	SLCO1B3
Q07869	PPARA
P27338	MAOB
P18089	ADRA2B
P10826	RARB
P10275	AR
P04278	SHBG
Q99685	MGLL
P48443	RXRG
P21397	MAOA
P10276	RARA
P05093	CYP17A1
P00918	CA2
Q9BZ11	ADAM33
Q99720	SIGMAR1
Q92731	ESR2
Q16790	CA9
Q15761	NPY5R
Q14994	NR1I3
Q13535	ATR
Q13133	NR1H3
Q08828	ADCY1
Q07820	MCL1
Q04759	PRKCQ
Q03181	PPARD
Q00987	MDM2
P56817	BACE1
P51449	RORC
P49682	CXCR3
P49286	MTNR1B
P42785	PRCP
P41595	HTR2B
P35228	NOS2
P31644	GABRA5
P30536	TSPO
P29475	NOS1
P29474	NOS3
P28845	HSD11B1
P28702	RXRB
P28223	HTR2A
P23219	PTGS1
P22303	ACHE
P21554	CNR1
P18065	IGFBP2
P16662	UGT2B7
P11511	CYP19A1
P10828	THRB
P08833	IGFBP1
P04035	HMGCR
P03372	ESR1
P02545	LMNA
P00915	CA1
O95136	S1PR2
O75936	BBOX1
O60674	JAK2
O43570	CA12
O00482	NR5A2

## Sheet: α-Copaene
UniProt_ID
P10275	AR
Q92731	ESR2
P11511	CYP19A1
P05093	CYP17A1
P03372	ESR1
Q9HC16	APOBEC3G
P18405	SRD5A1
P31941	APOBEC3A
P31213	SRD5A2
P04278	SHBG
Q13133	NR1H3
Q07869	PPARA
P49682	CXCR3
P34972	CNR2
P16662	UGT2B7
Q9GZU7	CTDSP1
P51449	RORC
P41145	OPRK1
P35372	OPRM1
P35348	ADRA1A
P22303	ACHE
P18031	PTPN1
Q9Y6L6	SLCO1B1
Q9Y5N1	HRH3
Q9Y2T6	GPR55
Q9UHC9	NPC1L1
Q9NPD5	SLCO1B3
Q99720	SIGMAR1
Q99572	P2RX7
Q96RI1	NR1H4
Q16790	CA9
Q13639	HTR4
Q12772	SREBF2
Q04759	PRKCQ
P49286	MTNR1B
P37288	AVPR1A
P34903	GABRA3
P33261	CYP2C19
P31645	SLC6A4
P30536	TSPO
P30304	CDC25A
P28845	HSD11B1
P28702	RXRB
P23975	SLC6A2
P19099	CYP11B2
P18089	ADRA2B
P16050	ALOX15
P15538	CYP11B1
P14867	GABRA1
P09884	POLA1
P08913	ADRA2A
P08842	STS
P08183	ABCB1
P08173	CHRM4
P08172	CHRM2
P06276	BCHE
P05177	CYP1A2
P04035	HMGCR
P00918	CA2
P00915	CA1
O43570	CA12

## Sheet: (-)-Isocomene
UniProt_ID
P31941	APOBEC3A
Q9HC16	APOBEC3G
P11511	CYP19A1
P10275	AR
P28845	HSD11B1
Q9GZU7	CTDSP1
P35372	OPRM1
P34972	CNR2
P08172	CHRM2
P04150	NR3C1
P00918	CA2
Q99720	SIGMAR1
Q15761	NPY5R
Q12809	KCNH2
Q07869	PPARA
P41145	OPRK1
P29474	NOS3
P23975	SLC6A2
P18089	ADRA2B
P18031	PTPN1
P16662	UGT2B7
P11712	CYP2C9
P00915	CA1
O75469	NR1I2
Q9Y6L6	SLCO1B1
Q9Y5N1	HRH3
Q9UM73	ALK
Q9NR96	TLR9
Q9NPD5	SLCO1B3
Q9H228	S1PR5
Q99572	P2RX7
Q96KQ7	EHMT2
Q92731	ESR2
Q8NER1	TRPV1
Q16790	CA9
Q16665	HIF1A
Q15125	EBP
Q14994	NR1I3
Q13133	NR1H3
P80365	HSD11B2
P56817	BACE1
P49286	MTNR1B
P43681	CHRNA4
P41594	GRM5
P37288	AVPR1A
P35354	PTGS2
P35228	NOS2
P31645	SLC6A4
P31644	GABRA5
P30536	TSPO
P28702	RXRB
P28566	HTR1E
P28472	GABRB3
P25929	NPY1R
P25105	PTAFR
P24046	GABRR1
P23219	PTGS1
P22748	CA4
P22303	ACHE
P21917	DRD4
P18825	ADRA2C
P18405	SRD5A1
P15538	CYP11B1
P10828	THRB
P10276	RARA
P09884	POLA1
P08913	ADRA2A
P08908	HTR1A
P08173	CHRM4
P06401	PGR
P05177	CYP1A2
P04278	SHBG
P03372	ESR1
O43570	CA12
O00519	FAAH

## Sheet: β-Copaene
UniProt_ID
P18405	SRD5A1
P31213	SRD5A2
P11511	CYP19A1
P04278	SHBG
P16662	UGT2B7
Q92731	ESR2
P34972	CNR2
Q9HC16	APOBEC3G
Q99720	SIGMAR1
Q07869	PPARA
P35372	OPRM1
P31941	APOBEC3A
P22303	ACHE
P10275	AR
P03372	ESR1
Q9GZU7	CTDSP1
Q96RI1	NR1H4
P54707	ATP12A
P41143	OPRD1
P37058	HSD17B3
P28845	HSD11B1
P08185	SERPINA6
P08173	CHRM4
P05093	CYP17A1
Q9Y6L6	SLCO1B1
Q9Y5N1	HRH3
Q9NPD5	SLCO1B3
Q99685	MGLL
Q99500	S1PR3
Q8TDU6	GPBAR1
Q16790	CA9
Q13639	HTR4
Q13133	NR1H3
Q07343	PDE4B
Q04759	PRKCQ
P49682	CXCR3
P49286	MTNR1B
P42785	PRCP
P41145	OPRK1
P35228	NOS2
P29475	NOS1
P28223	HTR2A
P27338	MAOB
P24723	PRKCH
P24593	IGFBP5
P23219	PTGS1
P20813	CYP2B6
P19099	CYP11B2
P18089	ADRA2B
P18031	PTPN1
P17706	PTPN2
P16473	TSHR
P15538	CYP11B1
P11473	VDR
P11413	G6PD
P08842	STS
P08183	ABCB1
P06276	BCHE
P04035	HMGCR
P00918	CA2
P00915	CA1
O43570	CA12

## Sheet: Aromandendrene
UniProt_ID
P34972	CNR2
P11511	CYP19A1
P04278	SHBG
Q07869	PPARA
P10275	AR
Q9HC16	APOBEC3G
P31941	APOBEC3A
P31213	SRD5A2
P08183	ABCB1
P06401	PGR
Q9Y6L6	SLCO1B1
Q99720	SIGMAR1
Q92731	ESR2
P35354	PTGS2
P31645	SLC6A4
P28845	HSD11B1
P23975	SLC6A2
P18825	ADRA2C
P18405	SRD5A1
P16662	UGT2B7
P05093	CYP17A1
P04150	NR3C1
P03372	ESR1
P00915	CA1
Q9NPD5	SLCO1B3
Q9GZU7	CTDSP1
Q99685	MGLL
Q99571	P2RX4
Q16790	CA9
Q16665	HIF1A
Q15761	NPY5R
Q13133	NR1H3
Q04759	PRKCQ
Q01959	SLC6A3
P54707	ATP12A
P49682	CXCR3
P49286	MTNR1B
P41146	OPRL1
P37058	HSD17B3
P36544	CHRNA7
P35372	OPRM1
P35228	NOS2
P31644	GABRA5
P29474	NOS3
P28566	HTR1E
P28223	HTR2A
P27338	MAOB
P24593	IGFBP5
P23415	GLRA1
P22303	ACHE
P21917	DRD4
P21554	CNR1
P21453	S1PR1
P19838	NFKB1
P18089	ADRA2B
P15538	CYP11B1
P14867	GABRA1
P14416	DRD2
P08235	NR3C2
P08185	SERPINA6
P08173	CHRM4
P00918	CA2
O43570	CA12
O43193	MLNR
O00748	CES2

## Sheet: β-Sesquiphellanderene
UniProt_ID
Q99720	SIGMAR1
Q9Y6L6	SLCO1B1
Q9NPD5	SLCO1B3
Q96RI1	NR1H4
Q13133	NR1H3
Q07973	CYP24A1
P48449	LSS
P43235	CTSK
P40763	STAT3
P30304	CDC25A
P27487	DPP4
P27338	MAOB
P21397	MAOA
P18825	ADRA2C
P18089	ADRA2B
P11473	VDR
P08908	HTR1A
Q9Y4P1	ATG4B
Q9BZ11	ADAM33
Q99685	MGLL
Q16790	CA9
Q15125	EBP
Q13547	HDAC1
Q13526	PIN1
Q07869	PPARA
P41595	HTR2B
P41145	OPRK1
P37268	FDFT1
P37231	PPARG
P35462	DRD3
P35372	OPRM1
P35354	PTGS2
P34972	CNR2
P31941	APOBEC3A
P31645	SLC6A4
P31644	GABRA5
P30536	TSPO
P30305	CDC25B
P28335	HTR2C
P26358	DNMT1
P24593	IGFBP5
P23975	SLC6A2
P22303	ACHE
P21917	DRD4
P21554	CNR1
P19838	NFKB1
P18405	SRD5A1
P18065	IGFBP2
P15538	CYP11B1
P14416	DRD2
P14324	FDPS
P11229	CHRM1
P10828	THRB
P10144	GZMB
P08913	ADRA2A
P08833	IGFBP1
P08173	CHRM4
P06401	PGR
P05093	CYP17A1
P04054	PLA2G1B
P00915	CA1
O95749	GGPS1
O75762	TRPA1
O75164	KDM4A
O43570	CA12
O14684	PTGES

## Sheet: Naphthalene, 1,2,3,4,4a,7-hexah
UniProt_ID
Q9Y5N1	HRH3
Q8NER1	TRPV1
P11511	CYP19A1
P34972	CNR2
P29474	NOS3
P18089	ADRA2B
Q9HC16	APOBEC3G
Q7Z2W7	TRPM8
Q16665	HIF1A
Q12809	KCNH2
Q07869	PPARA
P52333	JAK3
P35228	NOS2
P31941	APOBEC3A
P28335	HTR2C
P22460	KCNA5
P22303	ACHE
P18825	ADRA2C
P10275	AR
P08913	ADRA2A
P08684	CYP3A4
P04278	SHBG
Q9Y6L6	SLCO1B1
Q9Y2T6	GPR55
Q9Y2I1	NISCH
Q9UM73	ALK
Q9NPD5	SLCO1B3
Q9H228	S1PR5
Q9GZU7	CTDSP1
Q9BQF6	SENP7
Q92731	ESR2
Q14432	PDE3A
Q13370	PDE3B
Q08499	PDE4D
Q05469	LIPE
Q04609	FOLH1
Q01959	SLC6A3
P54829	PTPN5
P49682	CXCR3
P49286	MTNR1B
P43403	ZAP70
P42785	PRCP
P42574	CASP3
P35462	DRD3
P34903	GABRA3
P30536	TSPO
P29475	NOS1
P29274	ADORA2A
P28702	RXRB
P28566	HTR1E
P27338	MAOB
P23975	SLC6A2
P21554	CNR1
P19099	CYP11B2
P18031	PTPN1
P17706	PTPN2
P15538	CYP11B1
P14867	GABRA1
P14416	DRD2
P11086	PNMT
P0DMS8	ADORA3
P08173	CHRM4
P07099	EPHX1
P06493	CDK1
P06401	PGR
P05121	SERPINE1
P05093	CYP17A1
P03372	ESR1
P00918	CA2
P00915	CA1
O75604	USP2
O60755	GALR3
O60674	JAK2
O43570	CA12
O00748	CES2

## Sheet: Germacrene D
UniProt_ID
P31645	SLC6A4
P34972	CNR2
Q99720	SIGMAR1
Q07869	PPARA
P35354	PTGS2
P18825	ADRA2C
P18089	ADRA2B
P10275	AR
P08913	ADRA2A
P03372	ESR1
Q99685	MGLL
Q92731	ESR2
Q01959	SLC6A3
P35462	DRD3
P25105	PTAFR
P23975	SLC6A2
P18031	PTPN1
P17861	XBP1
P08912	CHRM5
P08173	CHRM4
P08172	CHRM2
P08151	GLI1
O95977	S1PR4
Q9Y6L6	SLCO1B1
Q9Y5N1	HRH3
Q9NR96	TLR9
Q9NPD5	SLCO1B3
Q9HC97	GPR35
Q9H228	S1PR5
Q9GZU7	CTDSP1
Q9BY08	EBPL
Q99814	EPAS1
Q99571	P2RX4
Q96DB2	HDAC11
Q92769	HDAC2
Q16665	HIF1A
Q13547	HDAC1
Q12809	KCNH2
Q07973	CYP24A1
Q06124	FAM160A1
Q05655	PRKCD
Q04759	PRKCQ
Q00987	MDM2
P51452	DUSP3
P49286	MTNR1B
P40763	STAT3
P31941	APOBEC3A
P31644	GABRA5
P31213	SRD5A2
P30542	ADORA1
P30536	TSPO
P30305	CDC25B
P29274	ADORA2A
P28222	HTR1B
P27338	MAOB
P22303	ACHE
P21554	CNR1
P20309	CHRM3
P19838	NFKB1
P18405	SRD5A1
P15428	HPGD
P14416	DRD2
P11511	CYP19A1
P11229	CHRM1
P10828	THRB
P0DMS8	ADORA3
P09884	POLA1
P08183	ABCB1
P05093	CYP17A1
P04278	SHBG
O75936	BBOX1
O60674	JAK2
O15379	HDAC3

## Sheet: α-Funebrene
UniProt_ID
P34972	CNR2
P41145	OPRK1
Q9HC16	APOBEC3G
Q99720	SIGMAR1
P31941	APOBEC3A
P23975	SLC6A2
P11511	CYP19A1
P05093	CYP17A1
Q92731	ESR2
Q07869	PPARA
P35372	OPRM1
P28845	HSD11B1
P10275	AR
P03372	ESR1
Q9Y5N1	HRH3
Q9NPD5	SLCO1B3
Q9GZU7	CTDSP1
Q13133	NR1H3
P80365	HSD11B2
P41143	OPRD1
P36544	CHRNA7
P31645	SLC6A4
P29474	NOS3
P27338	MAOB
P21397	MAOA
P18031	PTPN1
P08173	CHRM4
P06401	PGR
Q9Y6L6	SLCO1B1
Q99572	P2RX7
Q96RI1	NR1H4
Q16790	CA9
Q16665	HIF1A
Q13639	HTR4
Q01959	SLC6A3
P49840	GSK3A
P49286	MTNR1B
P35354	PTGS2
P35228	NOS2
P33261	CYP2C19
P30536	TSPO
P28566	HTR1E
P28472	GABRB3
P28335	HTR2C
P22692	IGFBP4
P22303	ACHE
P22001	KCNA3
P21554	CNR1
P19838	NFKB1
P19099	CYP11B2
P18405	SRD5A1
P16662	UGT2B7
P15538	CYP11B1
P11229	CHRM1
P10828	THRB
P08912	CHRM5
P08833	IGFBP1
P08172	CHRM2
P06276	BCHE
P04278	SHBG
P02545	LMNA
P00918	CA2
P00915	CA1
O75469	NR1I2
O60341	KDM1A
O43570	CA12
O43353	RIPK2
O00519	FAAH

[truncated: 10 more sheets: Bicyclogermacrene  , .alpha.-Farnesene, (+)-δ-Cadinene, Espatulenol, (-)-α-Bisabolol oxide B, cedr-8-ene , Chamazulene, Bisaboloxide A, Hexahydrofarnesyl acetone, (Z)-ene-yne-Dicycloether]
